# Supplementary material for: A novel one-pot three-component reaction for the synthesis of 5-arylamino-pyrrolo[2,3-d]pyrimidines under microwave irradiation
Source: Royal Society of Chemistry journal article supplement (doi:10.1039/c3ra47143h), 2014-01-01

## RSC Advances

# A novel one-pot three-component reaction for the synthesis of 5-arylmino-pyrrolo[2,3-*d*]pyrimidines under microwave irradiation

P. Seetham Naidu and Pulak J. Bhuyan\*

*Medicinal Chemistry Division, CSIR-North East Institute of Science & Technology, Jorhat  
785006, Assam, India.*

E Mail: [Pulak\\_jyoti@yahoo.com](mailto:Pulak_jyoti@yahoo.com)

## Electronic Supplementary Information

### List of Contents

|                                                                    |         |
|--------------------------------------------------------------------|---------|
| General Consideration .....                                        | S1      |
| Experimental and spectral data for compounds 4a-t.....             | S2-S9   |
| <sup>1</sup> H, <sup>13</sup> C NMR spectra of compounds 4a-t..... | S10-S29 |

### General Considerations:

<sup>1</sup>H NMR and <sup>13</sup>C NMR Spectra were recorded on Bruker Avance-DPX 300MHz and 75MHz FT NMR in CDCl<sub>3</sub> using TMS as an internal standard. Chemical shifts were reported in ppm (δ units). [Solvent peak (DMSO-d<sub>6</sub>) at around δ 3.36 and δ 2.50 peaks are not considered in all the spectra.]

## Experimental

### General procedure for preparation of 4:

In typical experimental procedure, equimolar amounts of *N,N*-dimethyl-6-amino uracil **1** (1 mmol, 0.155 g), phenyl glyoxal monohydrate **2a** (1 mmol, 0.152 g), and aniline **3a** (1 mmol, 0.093 g) were irradiated in closed vessel in presence of acetic acid (5 mL) in Synthos 3000 microwave reactor at 110 °C for 5 min. The reaction mixture was cooled to room temperature and then added cold water (10 mL) into the mixture. The solid product appeared was filtered and then purified by recrystallization from EtOH to afford the desired product **4a** as a white solid.

Similarly, compounds **4b-t** were synthesized.

#### 1,3-dimethyl-6-phenyl-5-(phenylamino)-1,7-dihydro-2*H*-pyrrolo[2,3-*d*]pyrimidine-2,4(3*H*)-dione (**4a**):

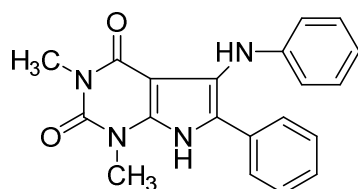

White solid; yield: 304 mg (88%); mp >300 °C; <sup>1</sup>H NMR (300 MHz, DMSO-*d*<sub>6</sub>) δ 11.54 (s, 1H), 7.73 (d, 2H), 7.47-7.23 (m, 3H), 7.07 (t, 2H), 6.64 (d, 2H), 6.20 (s, 1H), 3.60 (s, 3H), 3.22 (s, 3H); <sup>13</sup>C NMR (75 MHz, DMSO-*d*<sub>6</sub>) δ 159.12, 151.61, 140.01, 136.25, 131.74, 129.98, 128.83, 128.16, 125.59, 117.40, 115.13, 113.57, 107.42, 96.83, 30.82, 27.55; IR (KBr, cm<sup>-1</sup>): 3454.4, 3352.3, 3189.6, 1698.1, 1635.0, 1592.1, 1561.0, 1509.0, 1437.4, 1330.1, 1035.4, 972.9, 743.9; MS (m/z): 347.3 [M+1]; Anal. Calcd. For C<sub>20</sub>H<sub>18</sub>N<sub>4</sub>O<sub>2</sub>: C, 69.35; H, 5.24; N, 16.17. Found: C, 69.39; H, 5.27; N, 16.14.

#### 1,3-dimethyl-6-phenyl-5-(*p*-tolylamino)-1,7-dihydro-2*H*-pyrrolo[2,3-*d*]pyrimidine-2,4(3*H*)-dione (**4b**):

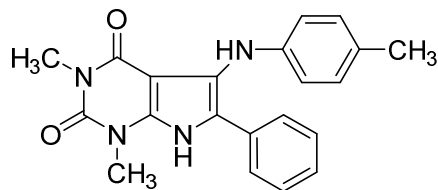

White solid; yield: 302 mg (84%); mp >300 °C; <sup>1</sup>H NMR (300 MHz, DMSO-*d*<sub>6</sub>) δ 11.52 (s, 1H), 7.66 (d, 1H), 7.51 (d, 1H), 7.35 (t, 2H), 7.25-7.07 (m, 3H), 6.84 (d, 1H), 6.49 (d, 1H), 6.15 (s, 1H), 3.54 (s, 3H), 3.17 (s, 3H), 2.12 (s, 3H); <sup>13</sup>C NMR (75 MHz, DMSO-*d*<sub>6</sub>) δ 158.08, 151.18, 145.59, 138.81, 131.46, 129.54, 128.74, 127.02, 126.71, 126.29, 125.79, 123.55, 119.89, 113.97, 96.69, 30.82, 27.72, 20.56; IR (KBr, cm<sup>-1</sup>): 3454.9, 3349.5, 3190.2, 1697.5, 1633.5, 1598.2, 1560.3, 1506.8, 1436.8,

1330.6, 974.0, 742.6; MS (m/z): 361.4 [M+1]; Anal. Calcd. For C<sub>21</sub>H<sub>20</sub>N<sub>4</sub>O<sub>2</sub>: C, 69.98; H, 5.59; N, 15.55. Found: C, 71.05; H, 5.61; N, 15.59.

**5-((4-chlorophenyl)amino)-1,3-dimethyl-6-phenyl-1,7-dihydro-2H-pyrrolo[2,3-d]pyrimidine-2,4(3H)-dione (4c):**

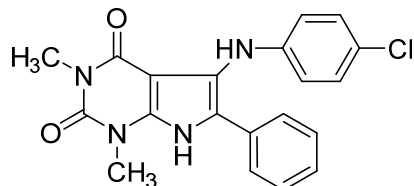

White solid; yield: 323 mg (85%); mp >300 °C; <sup>1</sup>H NMR (300 MHz, DMSO-*d*<sub>6</sub>) δ 11.53 (s, 1H), 7.65 (d, 1H), 7.52 (t, 1H), 7.39-7.32 (m, 3H), 7.22 (t, 1H), 7.06 (d, 2H), 6.58 (d, 1H), 6.17 (s, 1H), 3.54 (s, 3H), 3.18 (s, 3H); <sup>13</sup>C NMR (75 MHz, DMSO-*d*<sub>6</sub>) δ 158.75, 151.06, 149.64, 141.08, 134.17, 130.73, 129.57, 129.16, 128.28, 127.43, 126.51, 116.46, 108.89, 96.49, 30.56, 28.83; IR (KBr, cm<sup>-1</sup>): 3454.1, 3351.4, 3189.5, 1698.0, 1635.1, 1599.3, 1562.1, 1508.5, 1435.9, 1331.1, 1036.1, 973.6, 742.0; MS (m/z): 381.8 [M+1]; Anal. Calcd. For C<sub>20</sub>H<sub>17</sub>N<sub>4</sub>O<sub>2</sub>Cl: C, 63.08; H, 4.50; N, 14.71. Found: C, 63.04; H, 4.55; N, 14.79.

**5-((4-bromophenyl)amino)-1,3-dimethyl-6-phenyl-1,7-dihydro-2H-pyrrolo[2,3-d]pyrimidine-2,4(3H)-dione (4d):**

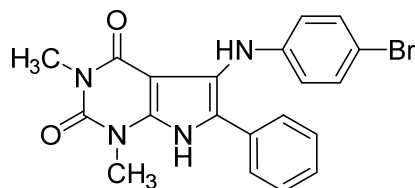

White solid; yield: 357 mg (84%); mp 287-289 °C; <sup>1</sup>H NMR (300 MHz, DMSO-*d*<sub>6</sub>) δ 11.54 (s, 1H), 7.66 (d, 1H), 7.52 (t, 1H), 7.37 (t, 2H), 7.25-7.15 (m, 3H), 6.54 (d, 2H), 6.16 (s, 1H), 3.54 (s, 3H), 3.16 (s, 3H); <sup>13</sup>C NMR (75 MHz, DMSO-*d*<sub>6</sub>) δ 157.84, 151.15, 147.84, 139.01, 131.64, 131.16, 128.86, 127.07, 126.52, 124.45, 118.36, 115.58, 107.83, 96.78, 30.84, 27.77; IR (KBr, cm<sup>-1</sup>): 3455.0, 3349.2, 3190.1, 1699.5, 1634.3, 1599.6, 1560.9, 1506.5, 1434.8, 1330.9, 1039.6, 974.7, 743.4; MS (m/z): 426.3 [M+1]; Anal. Calcd. For C<sub>20</sub>H<sub>17</sub>N<sub>4</sub>O<sub>2</sub>Br: C, 56.48; H, 4.03; N, 13.17. Found: C, 56.44; H, 4.10; N, 13.24.

**1,3-dimethyl-5-(phenylamino)-6-(p-tolyl)-1,7-dihydro-2H-pyrrolo[2,3-d]pyrimidine-2,4(3H)-dione (4e):**

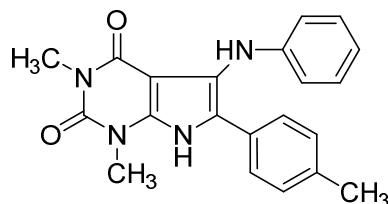

White solid; yield: 309 mg (86%); mp >300 °C; <sup>1</sup>H NMR (300 MHz, DMSO-*d*<sub>6</sub>) δ 11.72 (s, 1H), 8.20 (t, 2H), 7.92 (d, 1H), 7.82 (s, 1H), 7.76 (d, 1H), 7.21 (d, 2H), 6.58 (d, 2H), 6.29 (s, 1H), 3.55 (s, 3H),

3.24 (s, 3H), 2.31 (s, 3H);  $^{13}\text{C}$  NMR (75 MHz, DMSO- $d_6$ )  $\delta$  157.58, 151.24, 146.79, 139.98, 131.43, 129.76, 128.78, 127.13, 126.72, 126.25, 123.52, 120.09, 114.06, 96.85, 30.82, 27.69, 20.56; IR (KBr,  $\text{cm}^{-1}$ ): 3454.8, 3352.6, 3189.5, 1698.5, 1635.9, 1592.6, 1561.2, 1509.6, 1340.4, 1331.2, 1038.1, 974.6, 742.5; MS ( $m/z$ ): 361.4 [M+1]; Anal. Calcd. For  $\text{C}_{21}\text{H}_{20}\text{N}_4\text{O}_2$ : C, 69.98; H, 5.59; N, 15.55. Found: C, 71.02; H, 5.54; N, 15.50.

**1,3-dimethyl-6-(*p*-tolyl)-5-(*p*-tolylamino)-1,7-dihydro-2*H*-pyrrolo[2,3-*d*]pyrimidine-2,4(3*H*)-dione (4f):**

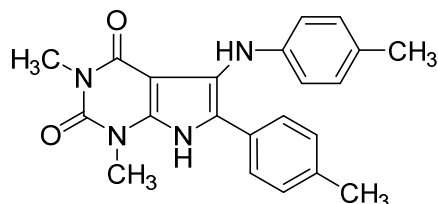

White solid; yield: 314 mg (84%); mp >300 °C;  $^1\text{H}$  NMR (300 MHz, DMSO- $d_6$ )  $\delta$  11.57 (s, 1H), 7.40 (d, 2H), 7.28 (d, 2H), 7.17 (d, 2H), 7.04 (d, 2H), 6.18 (s, 1H), 3.48 (s, 3H), 3.26 (s, 3H), 2.26 (s, 3H), 2.12 (s, 3H);  $^{13}\text{C}$  NMR (75 MHz, DMSO- $d_6$ )  $\delta$  161.79, 151.37, 148.00, 139.90, 135.28, 131.31, 129.74, 128.25, 121.63, 121.33, 119.74, 115.68, 97.34, 30.82, 28.08, 21.24, 20.56; IR (KBr,  $\text{cm}^{-1}$ ): 3457.6, 3348.8, 3188.9, 1699.5, 1638.3, 1596.4, 1504.7, 1438.3, 1333.1, 1037.9, 972.9, 744.0; MS ( $m/z$ ): 375.5 [M+1]; Anal. Calcd. For  $\text{C}_{22}\text{H}_{22}\text{N}_4\text{O}_2$ : C, 70.57; H, 5.92; N, 14.96. Found: C, 70.69; H, 5.99; N, 14.99.

**5-((4-chlorophenyl)amino)-1,3-dimethyl-6-(*p*-tolyl)-1,7-dihydro-2*H*-pyrrolo[2,3-*d*]pyrimidine-2,4(3*H*)-dione (4g):**

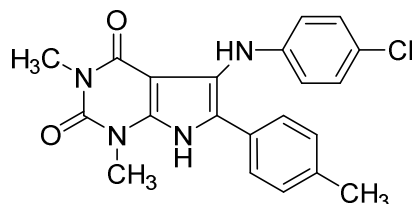

White solid; yield: 334 mg (85%); mp 285-286 °C;  $^1\text{H}$  NMR (300 MHz, DMSO- $d_6$ )  $\delta$  11.57 (s, 1H), 7.56 (d, 2H), 7.22 (d, 2H), 7.05 (t, 2H), 6.63 (d, 2H), 6.12 (s, 1H), 3.53 (s, 1H), 3.15 (s, 3H), 2.30 (s, 3H);  $^{13}\text{C}$  NMR (75 MHz, DMSO- $d_6$ )  $\delta$  158.15, 151.80, 148.05, 138.64, 129.45, 128.98, 128.24, 127.54, 126.60, 126.41, 116.50, 115.93, 108.23, 96.21, 30.83, 27.50, 19.01; IR (KBr,  $\text{cm}^{-1}$ ): 3458.1, 3344.6, 3191.5, 1697.8, 1635.2, 1598.6, 1506.0, 1436.1, 1330.6, 1033.4, 973.5, 743.2; MS ( $m/z$ ): 395.8 [M+1]; Anal. Calcd. For  $\text{C}_{21}\text{H}_{19}\text{N}_4\text{O}_2\text{Cl}$ : C, 63.88; H, 4.85; N, 14.19. Found: C, 63.85; H, 4.90; N, 14.15.

**5-((4-bromophenyl)amino)-1,3-dimethyl-6-(*p*-tolyl)-1,7-dihydro-2*H*-pyrrolo[2,3-*d*]pyrimidine-2,4(3*H*)-dione (4h):**

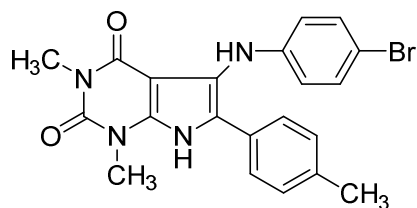

White solid; yield: 368 mg (84%); mp >300 °C;  $^1\text{H}$  NMR (300 MHz, DMSO- $d_6$ )  $\delta$  11.78 (s, 1H), 8.22 (d, 2H), 7.91 (d, 1H), 7.75 (t, 1H), 7.09 (d, 2H), 6.62 (d, 2H), 6.31 (s, 1H), 3.54 (s, 3H), 3.23 (s, 3H), 2.32 (s, 3H);  $^{13}\text{C}$  NMR (75 MHz, DMSO- $d_6$ )  $\delta$  158.01, 151.65, 147.85, 139.87, 131.61, 130.36, 128.92, 127.44, 126.53, 123.95, 119.63, 115.54, 107.72, 96.58, 30.79, 27.75, 19.85; IR (KBr,  $\text{cm}^{-1}$ ): 3459.7, 3346.2, 3189.6, 1698.5, 1634.3, 1599.7, 1508.2, 1437.5, 1332.2, 1032.2, 974.0, 744.3; MS (m/z): 440.4 [M+1]; Anal. Calcd. For  $\text{C}_{21}\text{H}_{19}\text{N}_4\text{O}_2\text{Br}$ : C, 57.41; H, 4.36; N, 12.75. Found: C, 57.49; H, 4.30; N, 12.82.

**6-(4-methoxyphenyl)-1,3-dimethyl-5-(phenylamino)-1,7-dihydro-2H-pyrrolo[2,3-d]pyrimidine-2,4(3H)-dione (4i):**

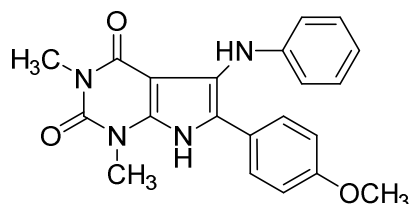

White solid; yield: 312 mg (83%); mp >300 °C;  $^1\text{H}$  NMR (300 MHz, DMSO- $d_6$ )  $\delta$  11.54 (s, 1H), 7.99 (d, 2H), 7.61 (d, 1H), 7.18 (s, 1H), 7.01 (t, 1H), 6.94 (d, 2H), 6.55 (t, 2H), 6.11 (s, 1H), 3.73 (s, 3H), 3.53 (s, 3H), 3.15 (s, 3H);  $^{13}\text{C}$  NMR (75 MHz, DMSO- $d_6$ )  $\delta$  158.39, 150.91, 148.49, 138.44, 131.41, 128.85, 127.45, 123.22, 119.72, 117.01, 114.42, 113.85, 107.28, 96.14, 55.09, 30.31, 27.25; IR (KBr,  $\text{cm}^{-1}$ ): 3419.8, 3342.5, 2814.9, 1689.9, 1632.8, 1595.3, 1519.6, 1384.4, 1351.2, 1246.8, 1182.0, 1025.1, 974.6, 742.4; MS (m/z): 377.5 [M+1]; Anal. Calcd. For  $\text{C}_{21}\text{H}_{20}\text{N}_4\text{O}_3$ : C, 67.01; H, 5.36; N, 14.88. Found: C, 67.06; H, 5.40; N, 14.83.

**6-(4-methoxyphenyl)-1,3-dimethyl-5-(*p*-tolylamino)-1,7-dihydro-2H-pyrrolo[2,3-d]pyrimidine-2,4(3H)-dione (4j):**

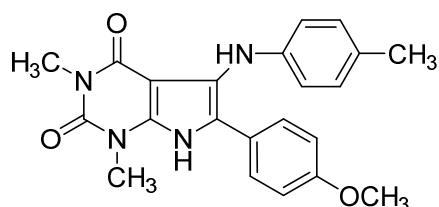

White solid; yield: 319 mg (82%); mp >300 °C;  $^1\text{H}$  NMR (300 MHz, DMSO- $d_6$ )  $\delta$  11.53 (s, 1H), 7.60 (d, 1H), 7.44 (d, 1H), 6.98-6.91 (m, 3H), 6.83 (d, 1H), 6.47 (d, 2H), 6.11 (s, 1H), 3.74 (s, 3H), 3.53 (s, 3H), 3.16 (s, 3H), 2.20 (s, 3H);  $^{13}\text{C}$  NMR (75 MHz, DMSO- $d_6$ )  $\delta$  159.39, 149.65, 141.02, 132.89, 129.55, 129.40, 128.26, 127.53, 126.12, 120.24, 116.41, 112.67, 107.99, 96.23, 30.76, 28.18, 20.00; IR (KBr,  $\text{cm}^{-1}$ ): 3445.9, 3349.8, 2810.3, 1689.2, 1632.9, 1594.5, 1554.1, 1519.8, 1383.9, 1349.6,

1252.3, 1180.6, 1038.5, 974.0, 744.2; MS (m/z): 391.7 [M+1]; Anal. Calcd. For C<sub>22</sub>H<sub>22</sub>N<sub>4</sub>O<sub>3</sub>: C, 67.68; H, 5.68; N, 14.35. Found: C, 67.65; H, 5.61; N, 14.40.

**5-((4-chlorophenyl)amino)-6-(4-methoxyphenyl)-1,3-dimethyl-1,7-dihydro-2H-pyrrolo[2,3-d]-pyrimidine-2,4(3H)-dione (4k):**

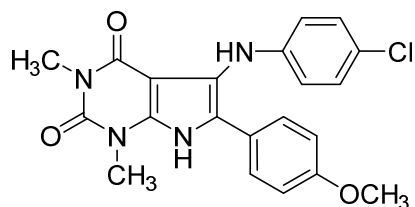

White solid; yield: 348 mg (85%); mp 297-298 °C; <sup>1</sup>H NMR (300 MHz, DMSO-*d*<sub>6</sub>) δ 11.47 (s, 1H), 7.58 (d, 1H), 7.43 (t, 2H), 7.05 (d, 1H), 6.93 (t, 2H), 6.56 (d, 2H), 3.74 (s, 3H), 3.52 (s, 3H), 3.16 (s, 3H); <sup>13</sup>C NMR (75 MHz, DMSO-*d*<sub>6</sub>) δ 158.55, 151.14, 147.64, 138.61, 128.80, 128.38, 127.94, 124.68, 123.72, 120.24, 117.13, 114.94, 114.34, 108.16, 96.64, 55.52, 30.80, 27.75; IR (KBr, cm<sup>-1</sup>): 3427.6, 3344.6, 2833.3, 1687.0, 1633.5, 1601.7, 1553.0, 1519.1, 1384.2, 1350.9, 1252.1, 1180.9, 1039.3, 973.2, 745.3; MS (m/z): 411.6 [M+1]; Anal. Calcd. For C<sub>21</sub>H<sub>19</sub>N<sub>4</sub>O<sub>3</sub>Cl: C, 61.39; H, 4.66; N, 13.64. Found: C, 61.42; H, 4.70; N, 13.61.

**5-((4-bromophenyl)amino)-6-(4-methoxyphenyl)-1,3-dimethyl-1,7-dihydro-2H-pyrrolo[2,3-d]-pyrimidine-2,4(3H)-dione (4l):**

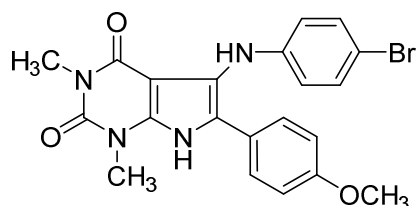

White solid; yield: 377 mg (83%); mp >300 °C; <sup>1</sup>H NMR (300 MHz, DMSO-*d*<sub>6</sub>) δ 11.48 (s, 1H), 7.58 (d, 1H), 7.48 (t, 2H), 7.16 (d, 2H), 6.93 (t, 2H), 6.51 (d, 1H), 6.12 (s, 1H), 3.74 (s, 3H), 3.53 (s, 3H), 3.16 (s, 3H); <sup>13</sup>C NMR (75 MHz, DMSO-*d*<sub>6</sub>) δ 158.57, 151.14, 148.07, 138.62, 131.62, 129.83, 127.96, 124.76, 123.69, 116.97, 115.50, 114.35, 107.68, 96.64, 55.59, 30.81, 27.75; IR (KBr, cm<sup>-1</sup>): 3427.8, 3344.4, 2835.2, 1686.7, 1633.4, 1599.2, 1519.2, 1384.3, 1351.0, 1251.9, 1181.3, 1039.5, 973.1, 745.2; MS (m/z): 456.2 [M+1]; Anal. Calcd. For C<sub>21</sub>H<sub>19</sub>N<sub>4</sub>O<sub>3</sub>Br: C, 55.40; H, 4.21; N, 12.31. Found: C, 55.46; H, 4.27; N, 12.38.

**6-(4-chlorophenyl)-1,3-dimethyl-5-(phenylamino)-1,7-dihydro-2H-pyrrolo[2,3-d]pyrimidine-2,4(3H)-dione (4m):**

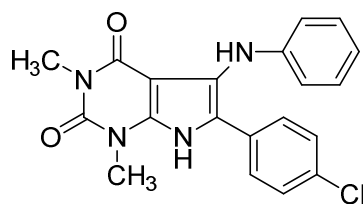

Yellow solid; yield: 345 mg (91%); mp 297–298 °C;  $^1\text{H}$  NMR (300 MHz,  $\text{DMSO-}d_6$ )  $\delta$  11.50 (s, 1H), 7.70 (d, 2H), 7.42 (d, 2H), 7.31 (s, 1H), 7.02 (t, 2H), 6.60 (d, 2H), 6.19 (s, 1H), 3.53 (s, 3H), 3.16 (s, 3H);  $^{13}\text{C}$  NMR (75 MHz,  $\text{DMSO-}d_6$ )  $\delta$  158.69, 151.40, 147.70, 139.09, 130.26, 129.13, 128.79, 127.76, 122.61, 120.06, 113.88, 96.80, 30.87, 27.74; IR (KBr,  $\text{cm}^{-1}$ ): 3475.5, 3343.5, 3195.9, 1693.8, 1633.1, 1599.6, 1560.9, 1507.3, 1436.1, 1317.2, 1266.9, 1033.3, 974.4, 742.7; MS ( $m/z$ ): 381.6 [M+1]; Anal. Calcd. For  $\text{C}_{20}\text{H}_{17}\text{N}_4\text{O}_2\text{Cl}$ : C, 63.08; H, 4.50; N, 14.71. Found: C, 63.15; H, 4.56; N, 14.67.

**6-(4-chlorophenyl)-1,3-dimethyl-5-(*p*-tolylamino)-1,7-dihydro-2*H*-pyrrolo[2,3-*d*]pyrimidine-2,4(3*H*)-dione (4n):**

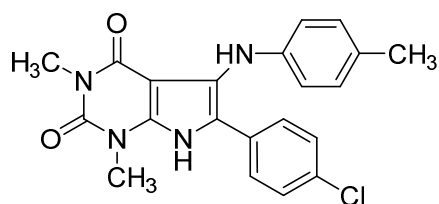

Light yellow solid; yield: 342 mg (87%); mp >300 °C;  $^1\text{H}$  NMR (300 MHz,  $\text{DMSO-}d_6$ )  $\delta$  11.64 (s, 1H), 7.69 (d, 2H), 7.42 (d, 2H), 6.85 (d, 2H), 6.49 (d, 2H), 6.19 (s, 1H), 3.53 (s, 3H), 3.15 (s, 3H), 2.13 (s, 3H);  $^{13}\text{C}$  NMR (75 MHz,  $\text{DMSO-}d_6$ )  $\delta$  157.23, 153.14, 145.14, 139.02, 130.33, 129.59, 128.76, 128.52, 127.65, 122.16, 120.67, 114.05, 96.65, 30.87, 27.72, 20.56; IR (KBr,  $\text{cm}^{-1}$ ): 3463.0, 3344.6, 3193.2, 1695.2, 1632.2, 1595.0, 1560.4, 1509.3, 1437.8, 1317.4, 1268.1, 1034.6, 973.8, 743.1; MS ( $m/z$ ): 395.4 [M+1]; Anal. Calcd. For  $\text{C}_{21}\text{H}_{19}\text{N}_4\text{O}_2\text{Cl}$ : C, 63.88; H, 4.85; N, 14.19. Found: C, 63.80; H, 4.81; N, 14.15.

**6-(4-chlorophenyl)-5-((4-chlorophenyl)amino)-1,3-dimethyl-1,7-dihydro-2*H*-pyrrolo[2,3-*d*]pyrimidine-2,4(3*H*)-dione (4o):**

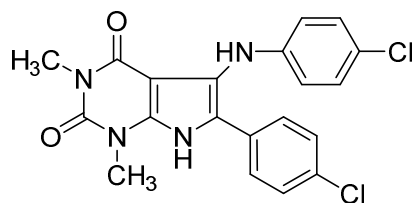

Light yellow solid; yield: 369 mg (89%); mp >300 °C;  $^1\text{H}$  NMR (300 MHz,  $\text{DMSO-}d_6$ )  $\delta$  11.79 (s, 1H), 8.17 (q, 2H), 7.91 (d, 1H), 7.75 (d, 1H), 7.05 (t, 2H), 6.63 (d, 2H), 6.29 (s, 1H), 3.54 (s, 3H), 3.23 (s, 3H);  $^{13}\text{C}$  NMR (75 MHz,  $\text{DMSO-}d_6$ )  $\delta$  157.87, 151.16, 147.39, 139.00, 131.18, 128.84, 127.03, 126.50, 124.36, 120.39, 118.53, 115.03, 108.13, 96.78, 30.84, 27.77; IR (KBr,  $\text{cm}^{-1}$ ): 3468.4, 3345.1, 3192.9, 1696.7, 1633.5, 1597.6, 1561.3, 1508.5, 1436.4, 1316.7, 1268.5, 1033.9, 974.4, 742.8; MS ( $m/z$ ): 416.3 [M+1]; Anal. Calcd. For  $\text{C}_{20}\text{H}_{16}\text{N}_4\text{O}_2\text{Cl}_2$ : C, 57.85; H, 3.88; N, 13.49. Found: C, 57.90; H, 3.93; N, 13.55.

**5-((4-bromophenyl)amino)-6-(4-chlorophenyl)-1,3-dimethyl-1,7-dihydro-2*H*-pyrrolo[2,3-*d*]pyrimidine-2,4(3*H*)-dione (4p):**

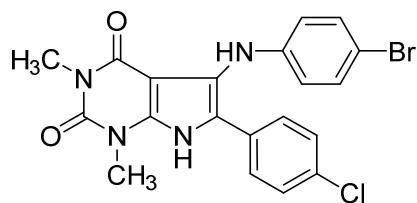

Light yellow solid; yield: 403 mg (88%); mp >300 °C;  $^1\text{H}$  NMR (300 MHz,  $\text{DMSO-}d_6$ )  $\delta$  11.57 (s, 1H), 7.68 (q, 2H), 7.51-7.39 (m, 4H), 7.18 (d, 1H), 6.53 (d, 1H), 6.20 (s, 1H), 3.52 (s, 3H), 3.16 (s, 3H);  $^{13}\text{C}$  NMR (75 MHz,  $\text{DMSO-}d_6$ )  $\delta$  157.82, 151.48, 147.30, 139.27, 131.70, 131.38, 128.90, 128.53, 127.92, 118.40, 115.68, 107.57, 96.62, 30.87, 27.62; IR (KBr,  $\text{cm}^{-1}$ ): 3460.4, 3349.2, 3190.1, 1690.0, 1633.5, 1602.2, 1552.5, 1510.9, 1438.2, 1318.5, 1269.4, 1033.1, 974.6, 743.1; MS ( $m/z$ ): 459.7 [M+1]; Anal. Calcd. For  $\text{C}_{20}\text{H}_{16}\text{N}_4\text{O}_2\text{BrCl}$ : C, 52.25; H, 3.51; N, 12.19. Found: C, 52.29; H, 3.47; N, 12.12.

**6-(4-bromophenyl)-1,3-dimethyl-5-(phenylamino)-1,7-dihydro-2H-pyrrolo[2,3-d]pyrimidine-2,4(3H)-dione (4q):**

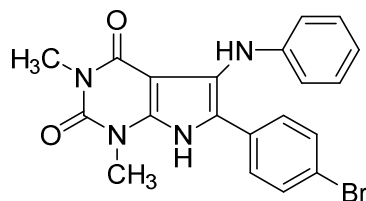

Light yellow solid; yield: 382 mg (90%); mp >300 °C;  $^1\text{H}$  NMR (300 MHz,  $\text{DMSO-}d_6$ )  $\delta$  11.53 (s, 1H), 7.61 (d, 1H), 7.44 (d, 2H), 7.01 (t, 2H), 6.94 (d, 2H), 6.56 (d, 2H), 6.11 (s, 1H), 3.53 (s, 3H), 3.16 (s, 3H);  $^{13}\text{C}$  NMR (75 MHz,  $\text{DMSO-}d_6$ )  $\delta$  158.67, 151.16, 148.99, 139.11, 131.10, 128.74, 127.28, 126.50, 124.33, 120.19, 118.99, 115.25, 107.43, 96.68, 30.80, 27.75; IR (KBr,  $\text{cm}^{-1}$ ): 3463.0, 3341.4, 3172.4, 1694.8, 1664.8, 1633.1, 1596.2, 1561.0, 1436.6, 1317.1, 1033.6, 973.0, 743.4; MS ( $m/z$ ): 426.3 [M+1]; Anal. Calcd. For  $\text{C}_{20}\text{H}_{17}\text{N}_4\text{O}_2\text{Br}$ : C, 56.48; H, 4.03; N, 13.17. Found: C, 56.54; H, 4.08; N, 13.21.

**6-(4-bromophenyl)-1,3-dimethyl-5-(*p*-tolylamino)-1,7-dihydro-2H-pyrrolo[2,3-d]pyrimidine-2,4(3H)-dione (4r):**

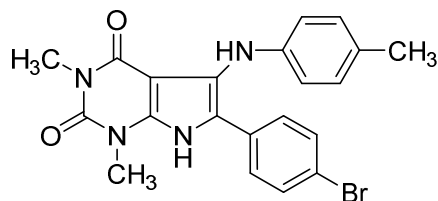

Light yellow solid; yield: 390 mg (89%); mp >300 °C;  $^1\text{H}$  NMR (300 MHz,  $\text{DMSO-}d_6$ )  $\delta$  11.34 (s, 1H), 7.31-7.16 (m, 5H), 6.93 (d, 2H), 6.84 (d, 1H), 6.20 (s, 1H), 3.53 (s, 3H), 3.18 (s, 3H), 2.31 (s, 3H);  $^{13}\text{C}$  NMR (75 MHz,  $\text{DMSO-}d_6$ )  $\delta$  158.37, 151.19, 140.36, 135.82, 134.11, 128.94, 128.55, 127.60, 127.07, 126.70, 120.16, 118.63, 113.81, 107.09, 96.91, 31.04, 27.93, 19.94; IR (KBr,  $\text{cm}^{-1}$ ): 3463.4, 3331.2, 3171.0, 1694.6, 1667.1, 1629.0, 1597.2, 1548.8, 1440.2, 1317.4, 1060.6, 973.8,



743.1; MS (m/z): 440.4 [M+1]; Anal. Calcd. For C<sub>21</sub>H<sub>19</sub>N<sub>4</sub>O<sub>2</sub>Br: C, 57.41; H, 4.36; N, 12.75. Found: C, 57.48; H, 4.30; N, 12.81.

**6-(4-bromophenyl)-5-((4-chlorophenyl)amino)-1,3-dimethyl-1,7-dihydro-2H-pyrrolo[2,3-d]-pyrimidine-2,4(3H)-dione (4s):**

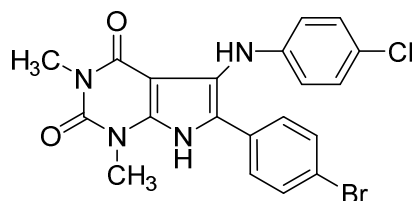

Light yellow solid; yield: 403 mg (88%); mp 299-300 °C; <sup>1</sup>H NMR (300 MHz, DMSO-*d*<sub>6</sub>) δ 11.56 (s, 1H), 7.59 (d, 3H), 7.45 (d, 1H), 7.06 (d, 2H), 6.57 (d, 2H), 6.20 (s, 1H), 3.53 (s, 3H), 3.15 (s, 3H); <sup>13</sup>C NMR (75 MHz, DMSO-*d*<sub>6</sub>) δ 159.12, 151.61, 147.81, 138.66, 131.74, 130.13, 128.83, 128.16, 117.40, 115.13, 113.57, 109.81, 97.04, 30.80, 27.75; IR (KBr, cm<sup>-1</sup>): 3463.6, 3338.5, 3176.9, 1694.6, 1667.6, 1633.0, 1597.2, 1561.0, 1437.2, 1316.9, 1032.1, 973.1, 744.0; MS (m/z): 459.5 [M+1]; Anal. Calcd. For C<sub>20</sub>H<sub>16</sub>N<sub>4</sub>O<sub>2</sub>BrCl: C, 52.25; H, 3.51; N, 12.19. Found: C, 52.21; H, 3.54; N, 12.22.

**6-(4-bromophenyl)-5-((4-bromophenyl)amino)-1,3-dimethyl-1,7-dihydro-2H-pyrrolo[2,3-d]-pyrimidine-2,4(3H)-dione (4t):**

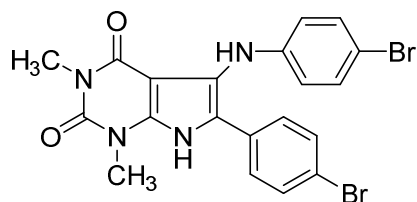

Light yellow solid; yield: 437 mg (87%); mp >300 °C; <sup>1</sup>H NMR (300 MHz, DMSO-*d*<sub>6</sub>) δ 11.46 (s, 1H), 7.58 (d, 2H), 7.43 (t, 1H), 7.16 (d, 1H), 6.96 (d, 2H), 6.52 (d, 2H), 6.11 (s, 1H), 3.52 (s, 3H), 3.16 (s, 3H); <sup>13</sup>C NMR (75 MHz, DMSO-*d*<sub>6</sub>) δ 158.75, 151.20, 140.68, 136.83, 132.81, 128.63, 127.61, 127.12, 126.70, 120.20, 119.15, 115.63, 105.39, 96.22, 31.10, 27.91; IR (KBr, cm<sup>-1</sup>): 3463.3, 3334.5, 3176.3, 1694.8, 1666.7, 1631.2, 1595.1, 1549.0, 1438.0, 1317.4, 1032.2, 973.1, 743.5; MS (m/z): 505.4 [M+1]; Anal. Calcd. For C<sub>20</sub>H<sub>16</sub>N<sub>4</sub>O<sub>2</sub>Br<sub>2</sub>: C, 47.65; H, 3.20; N, 11.12. Found: C, 47.68; H, 3.25; N, 11.18.

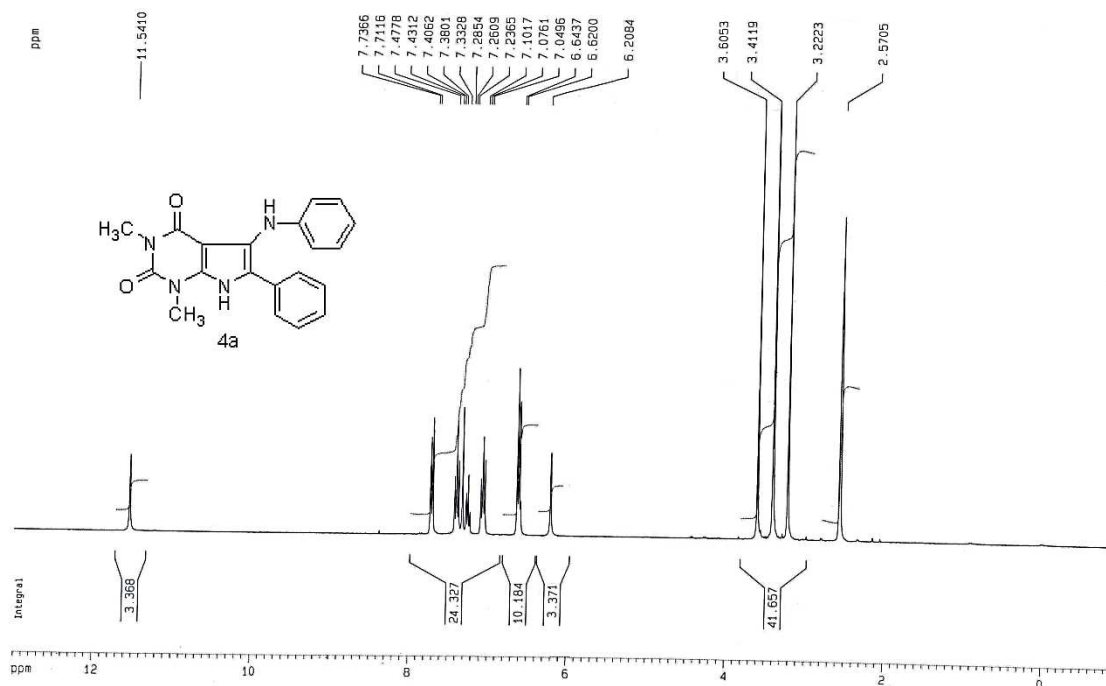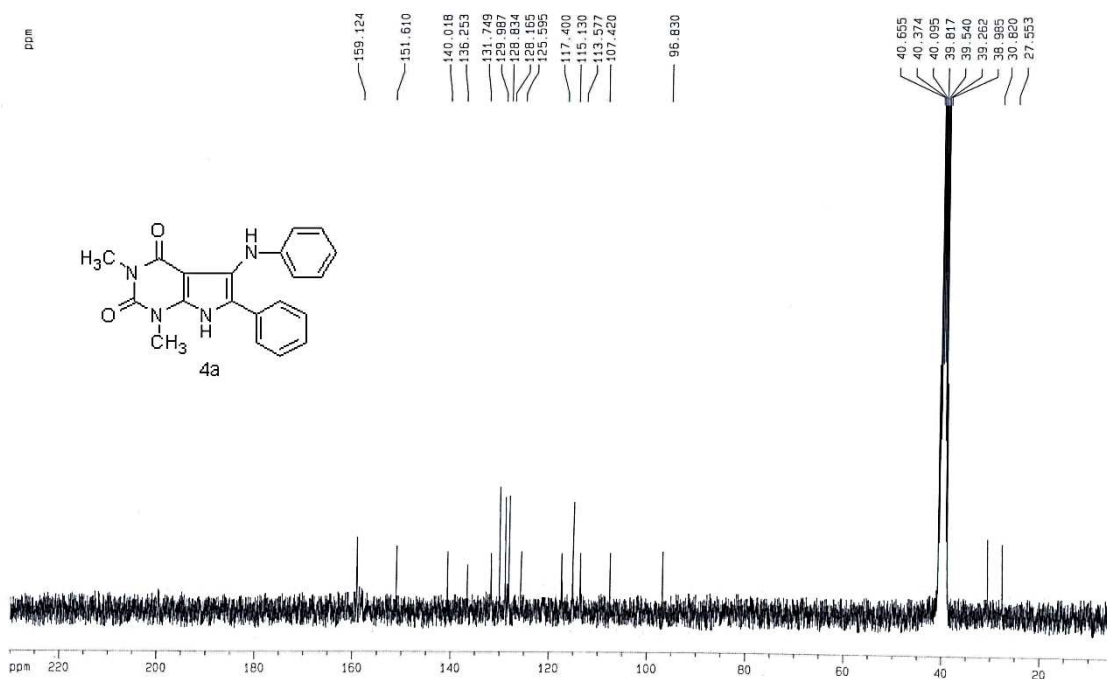

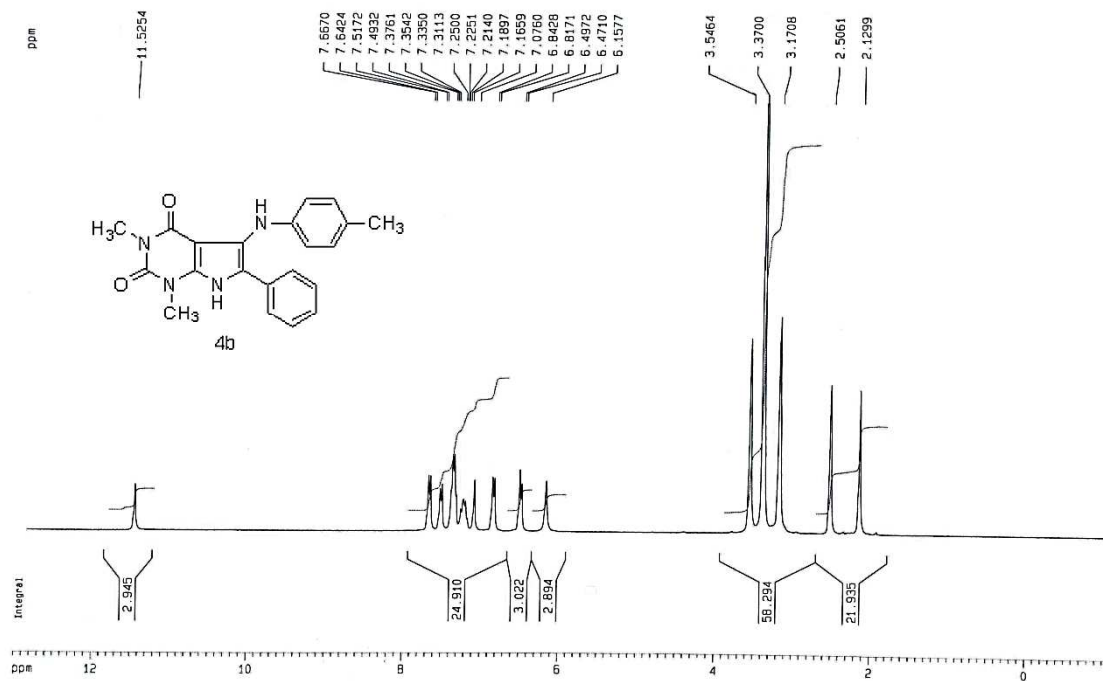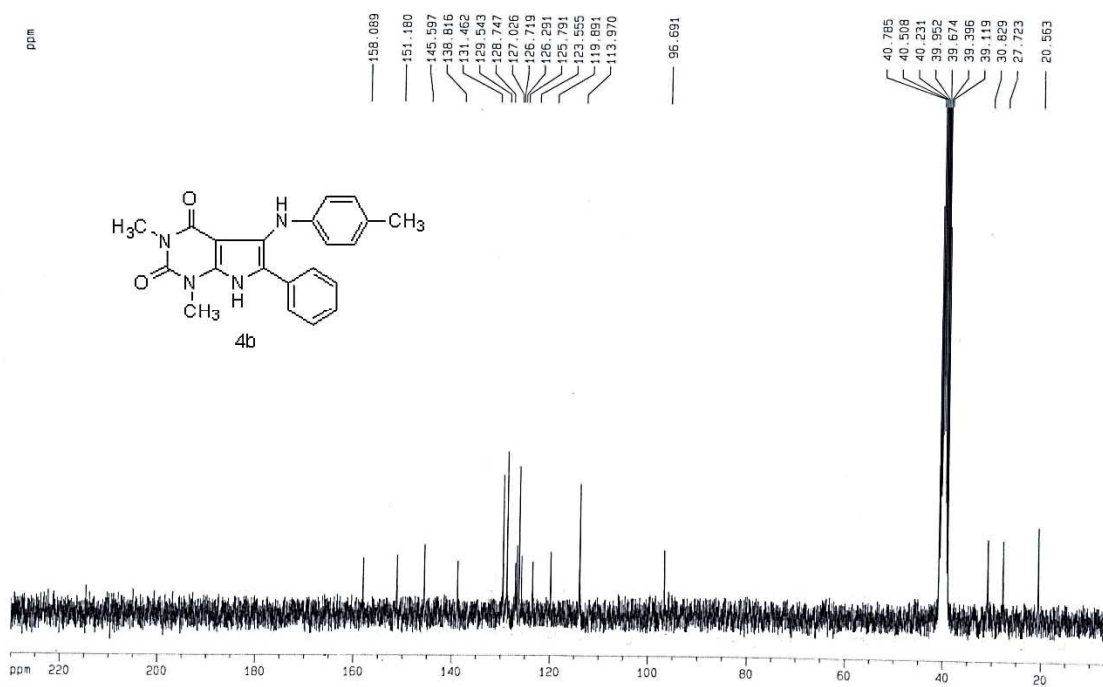

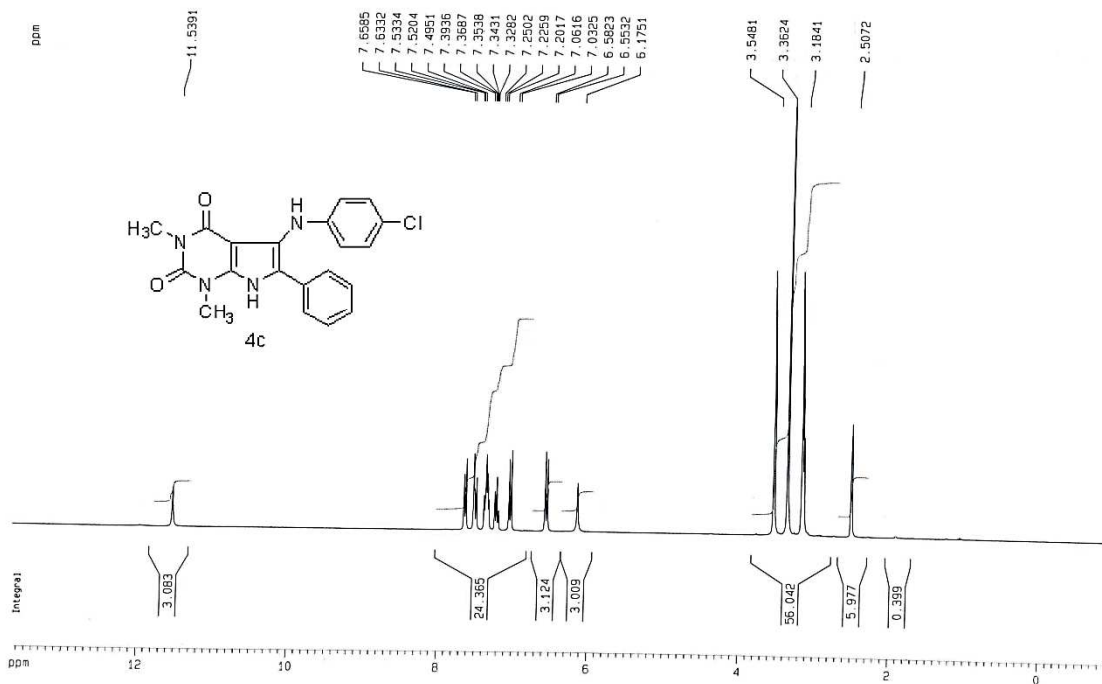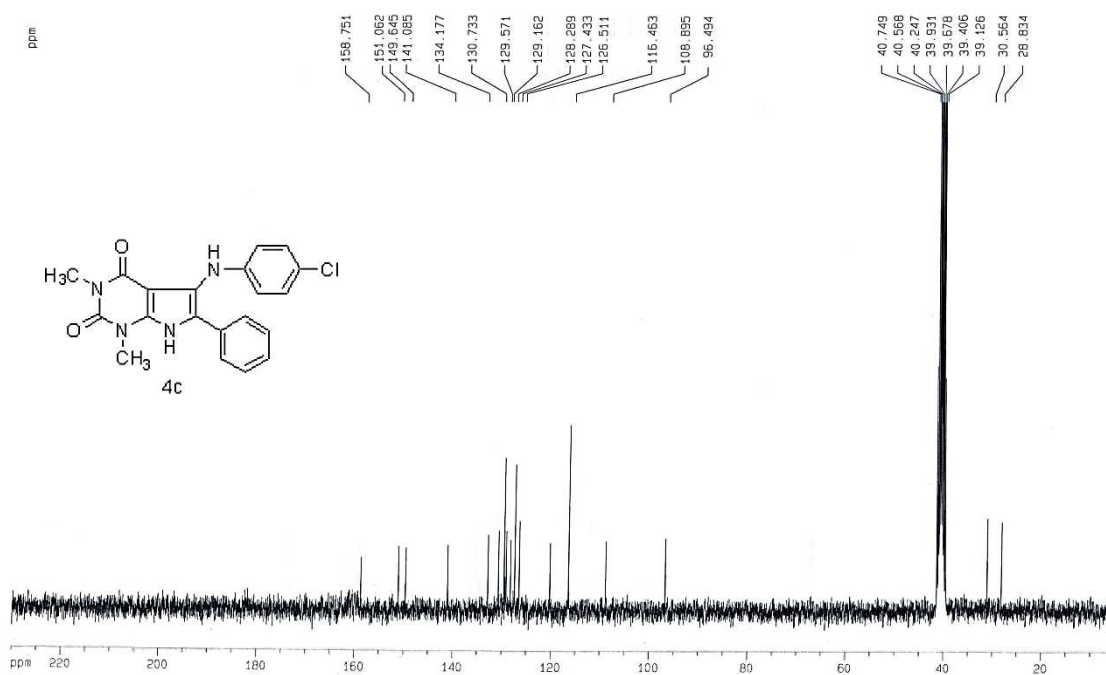

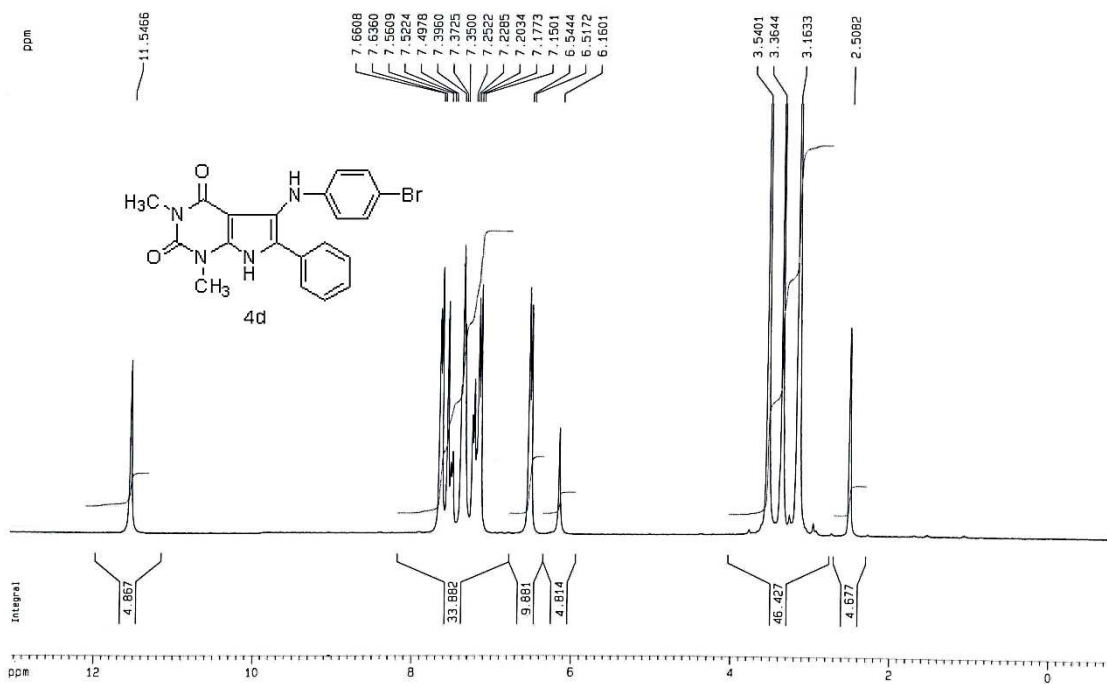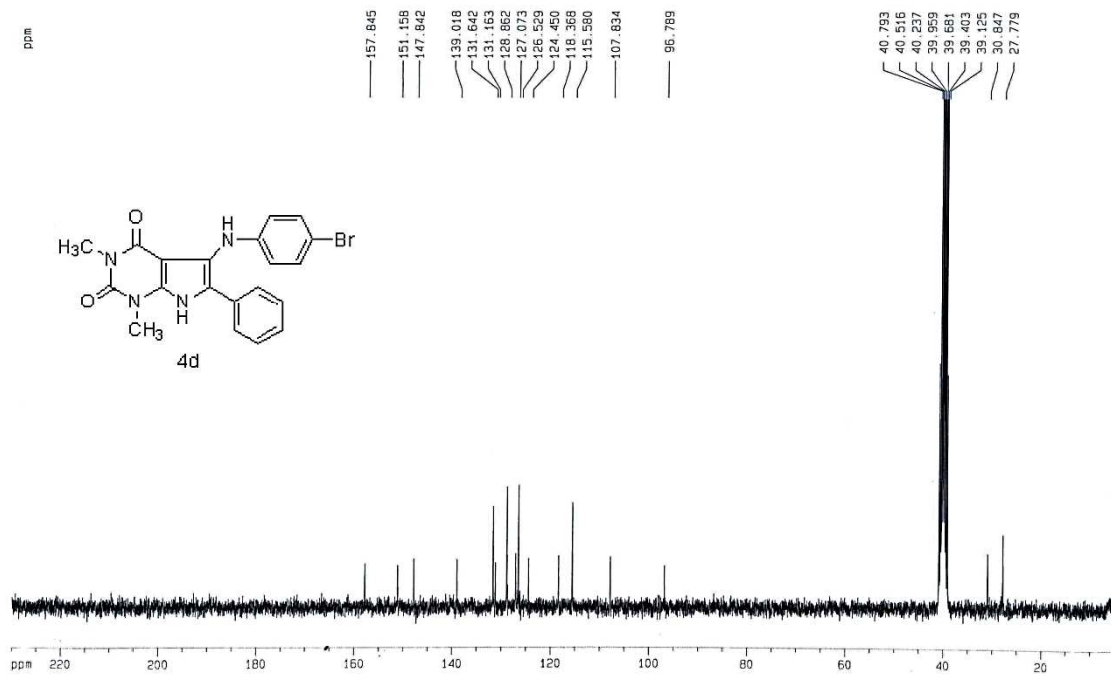

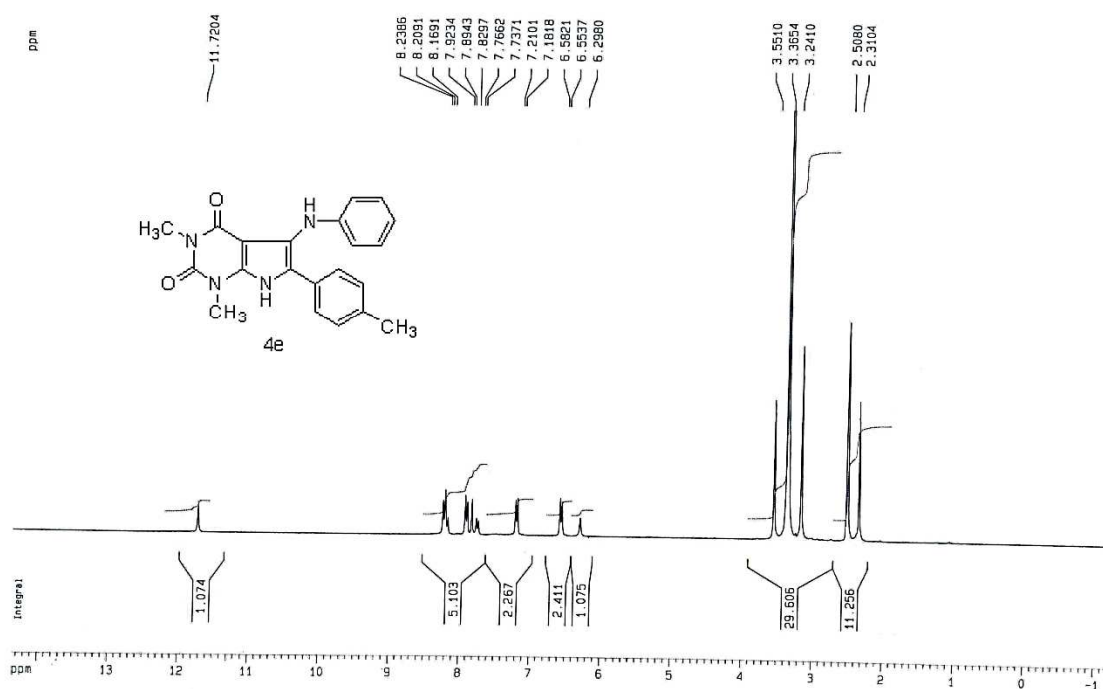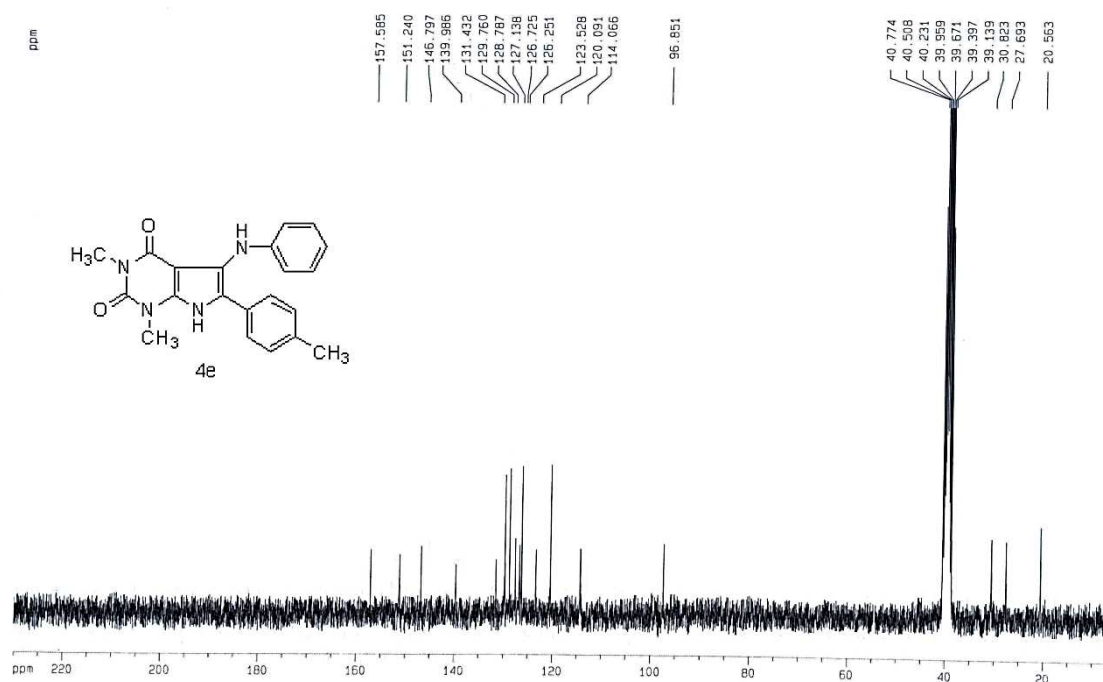

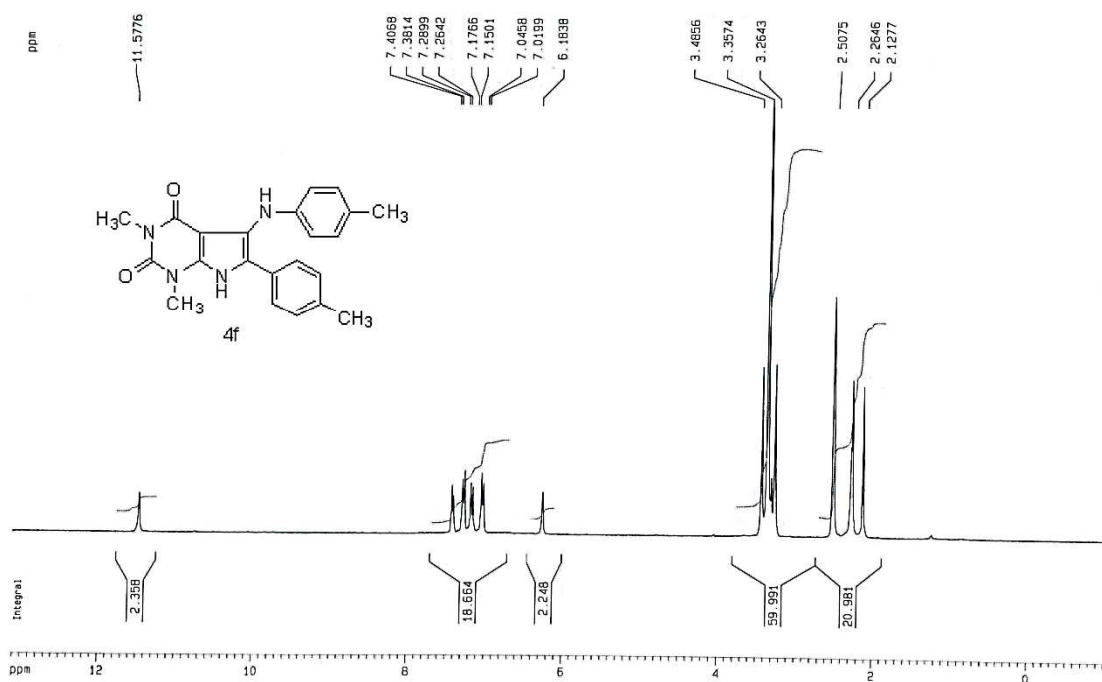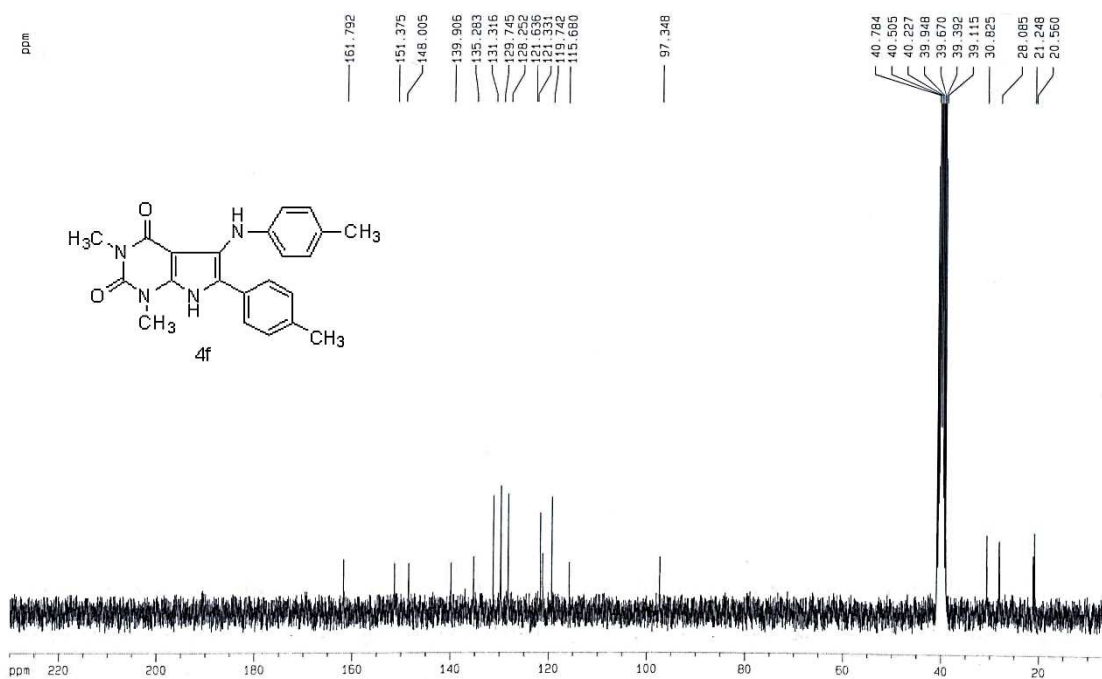

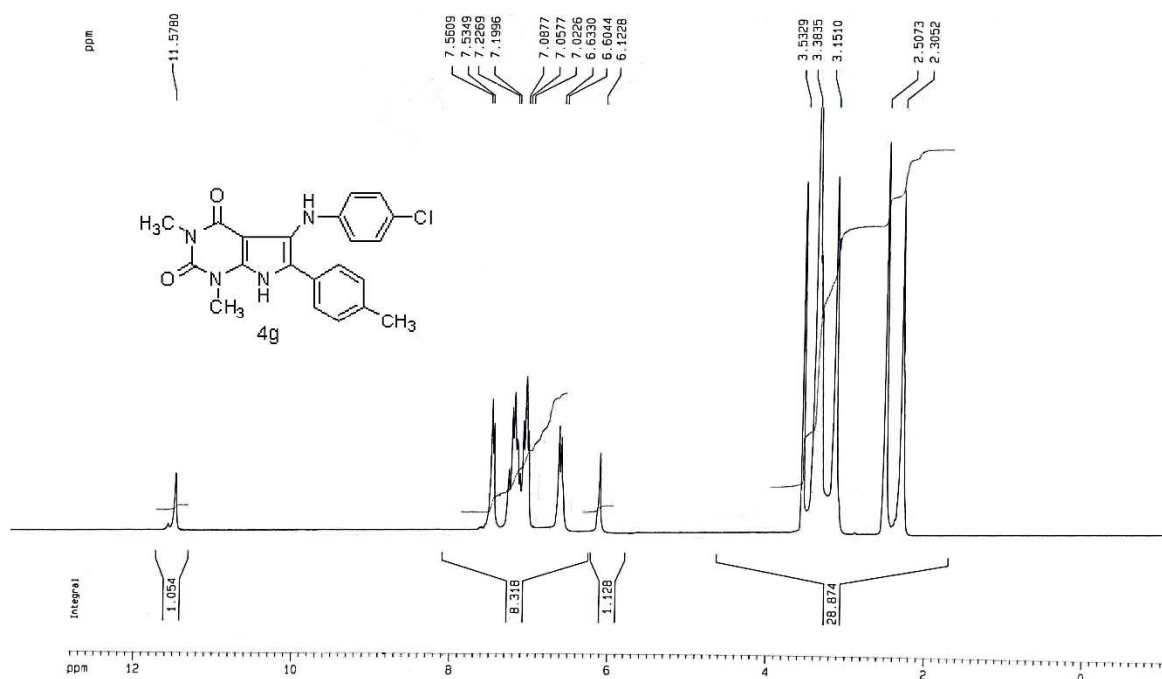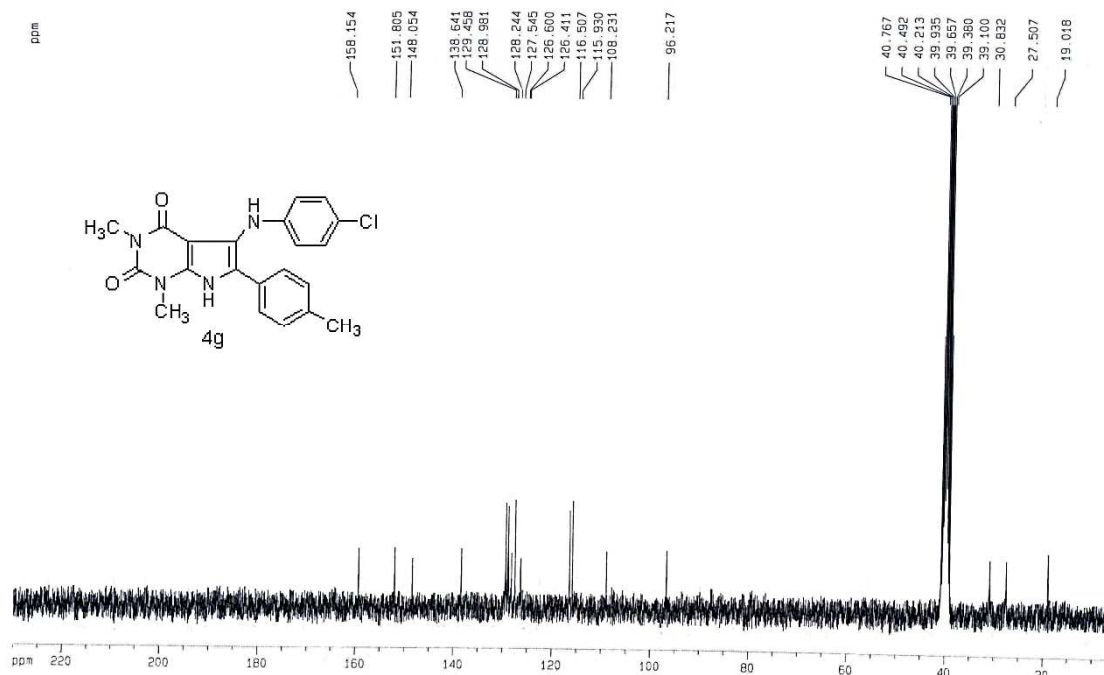



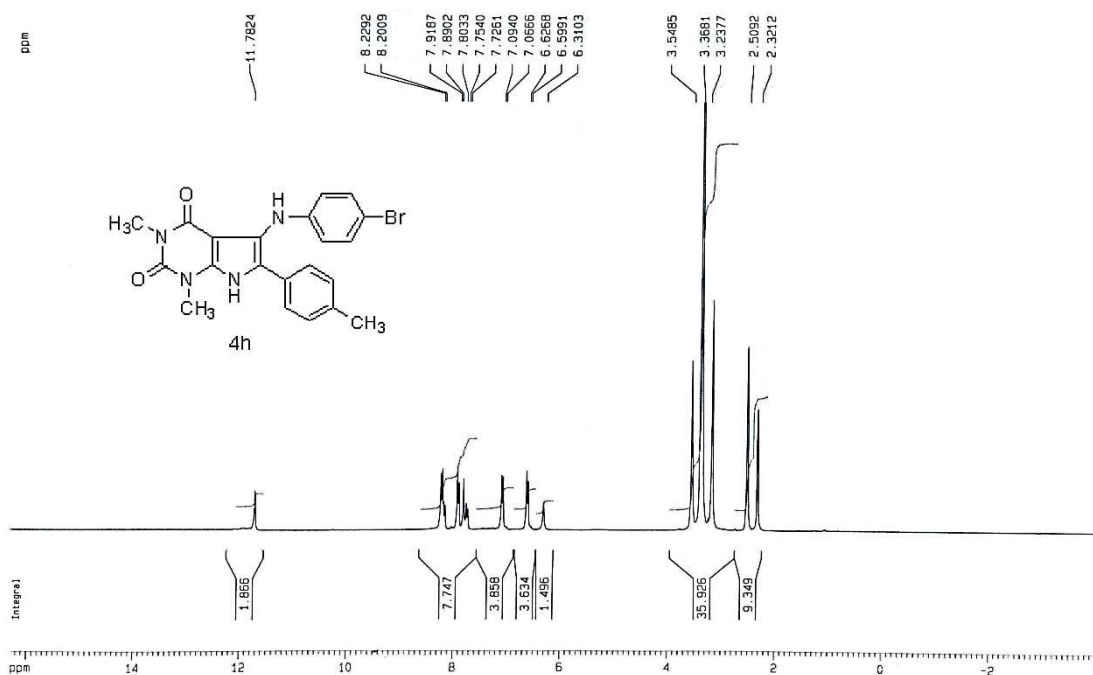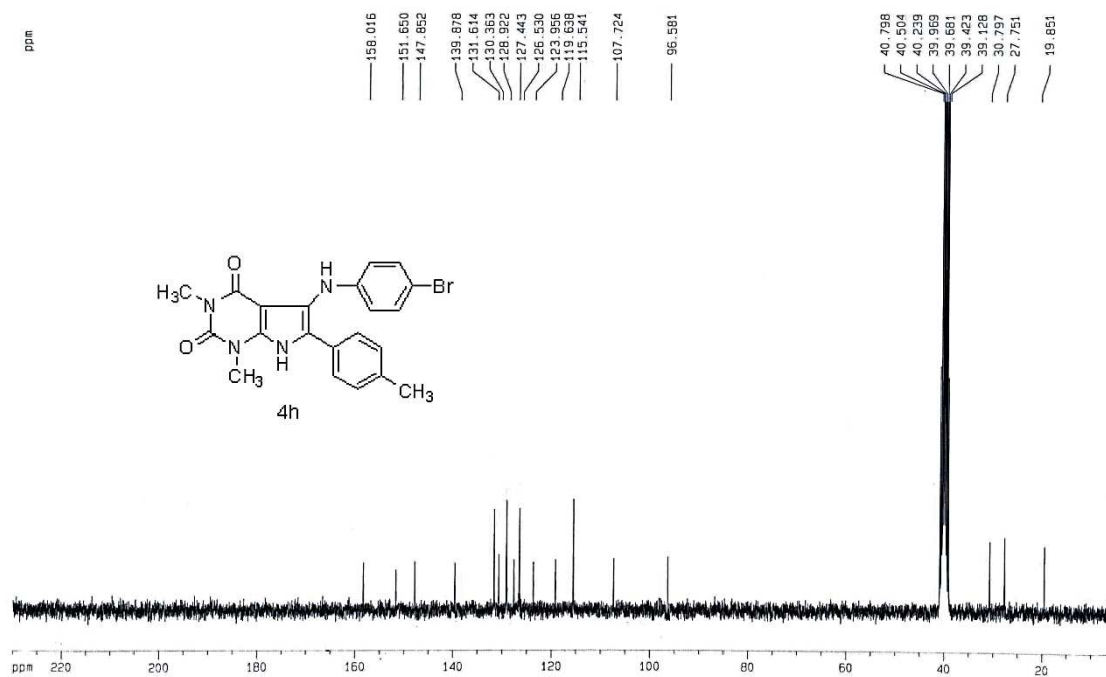

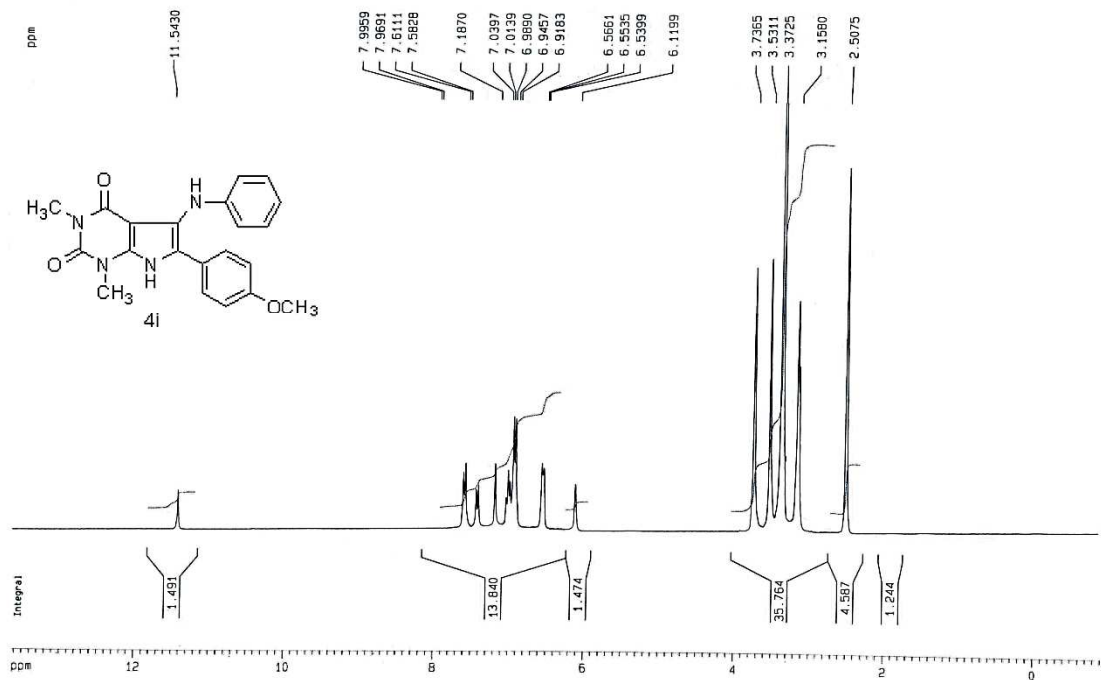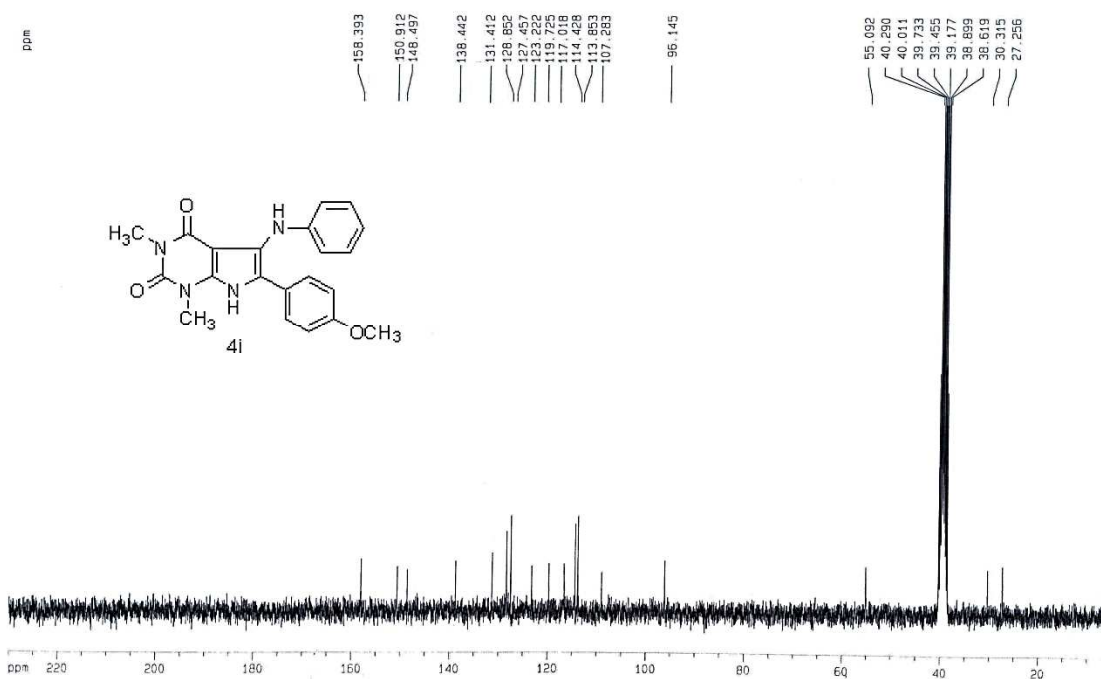

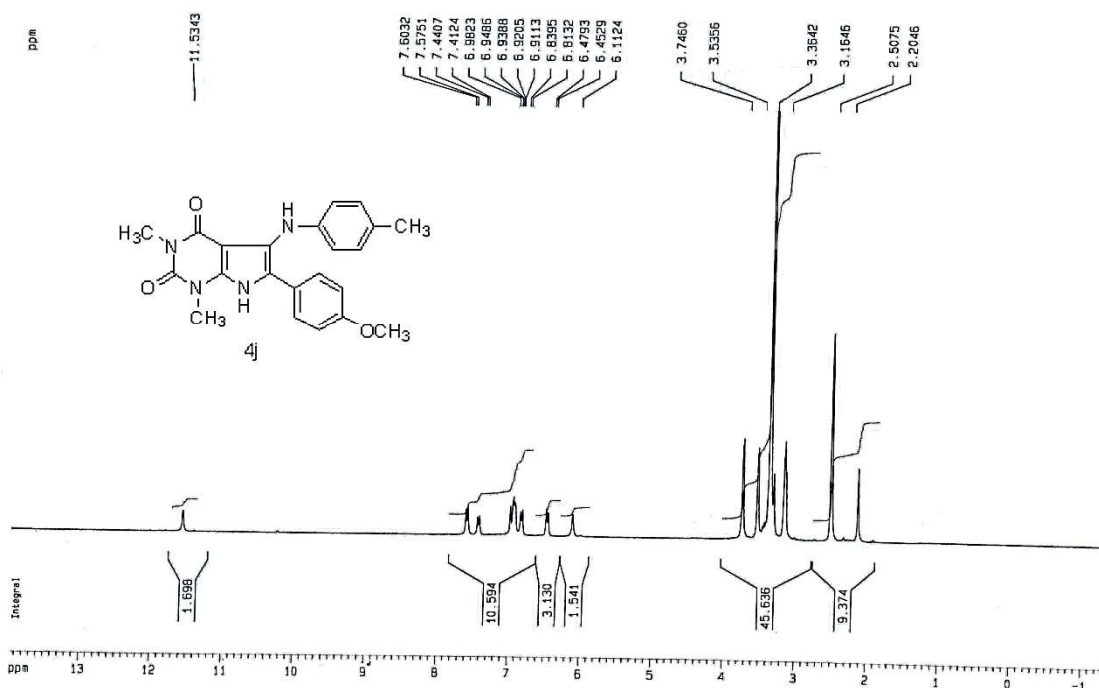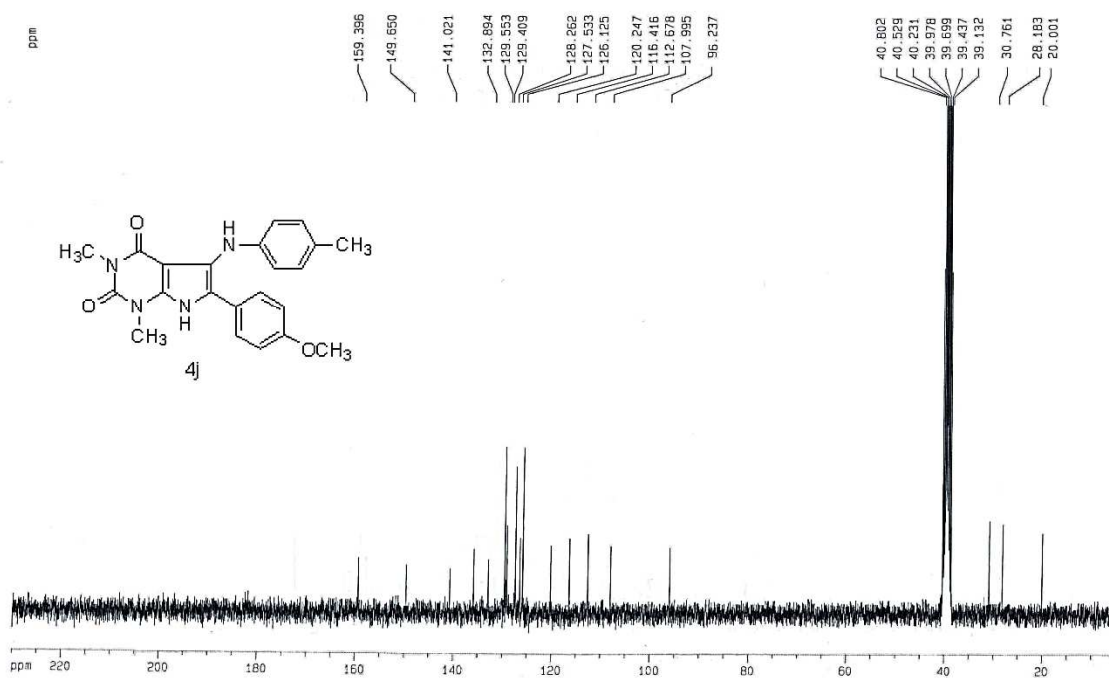

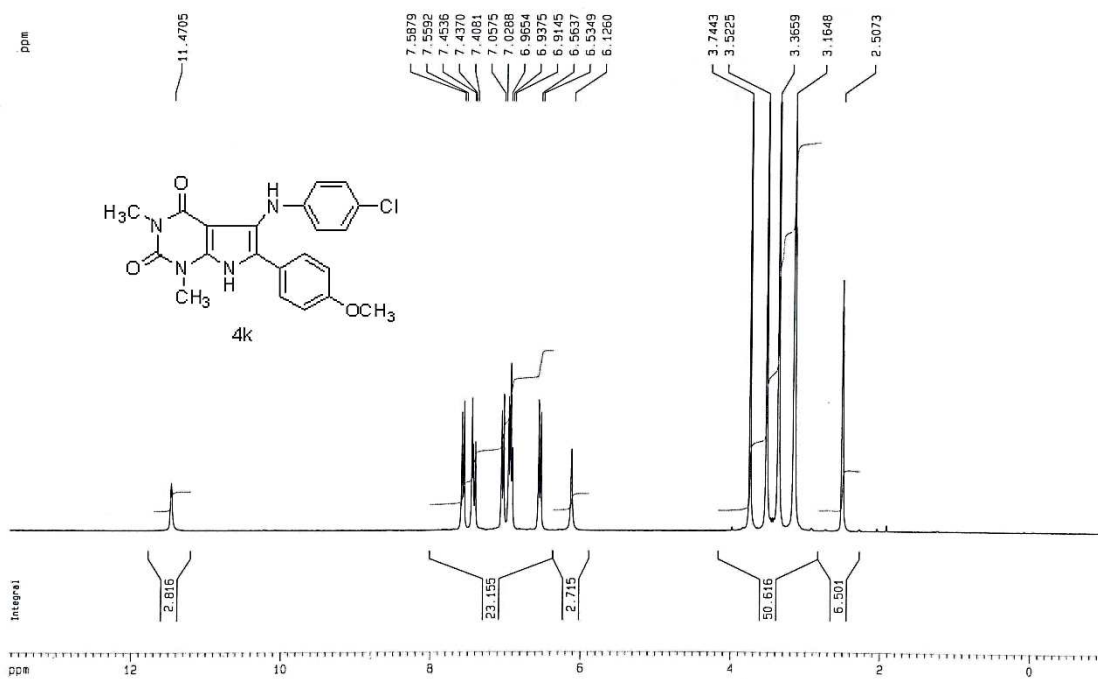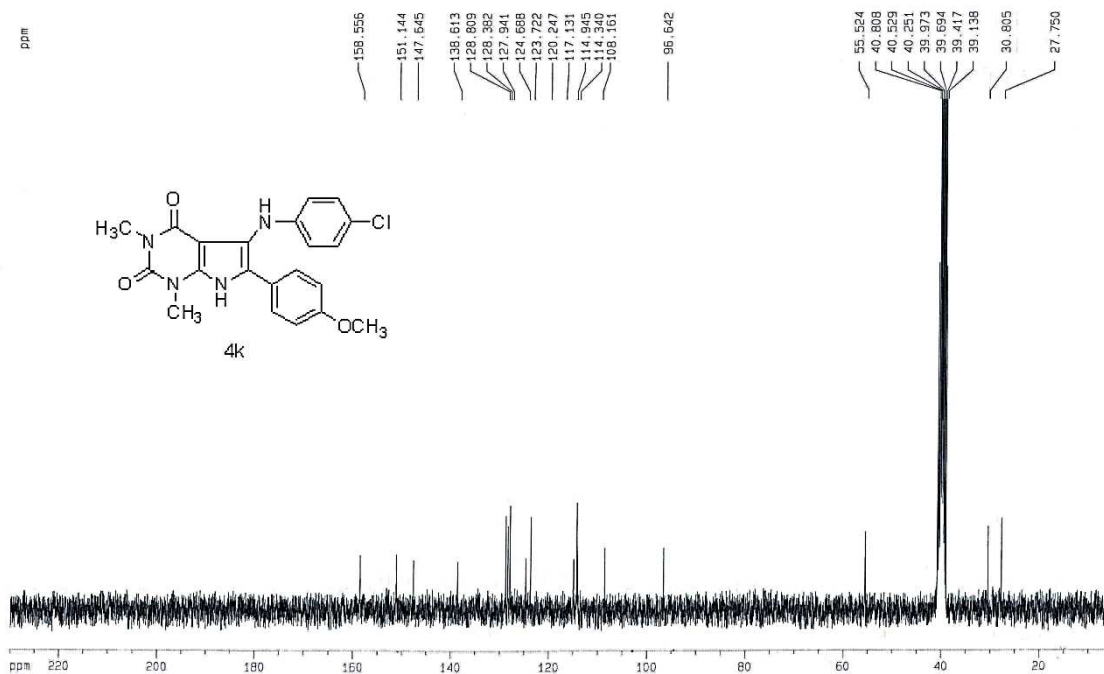

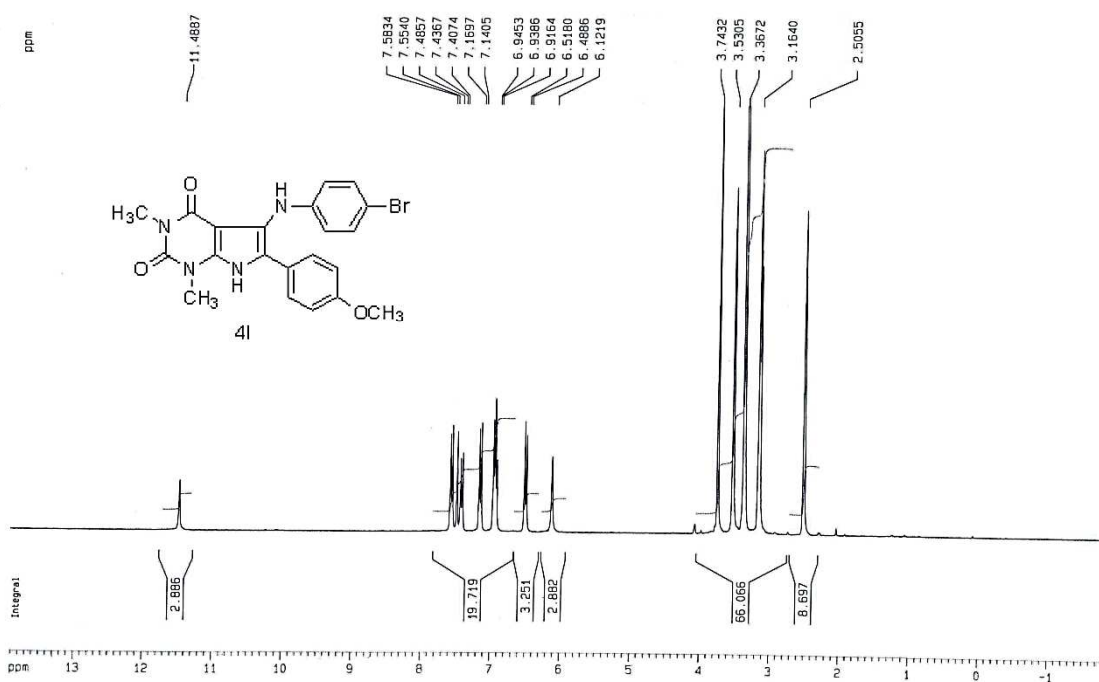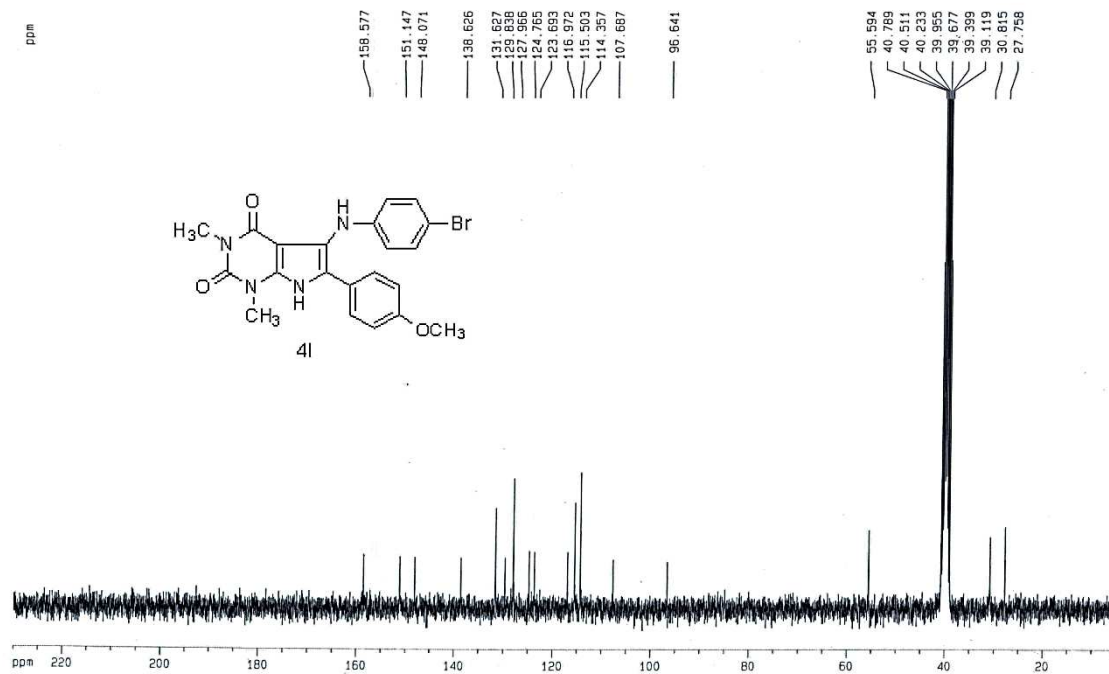

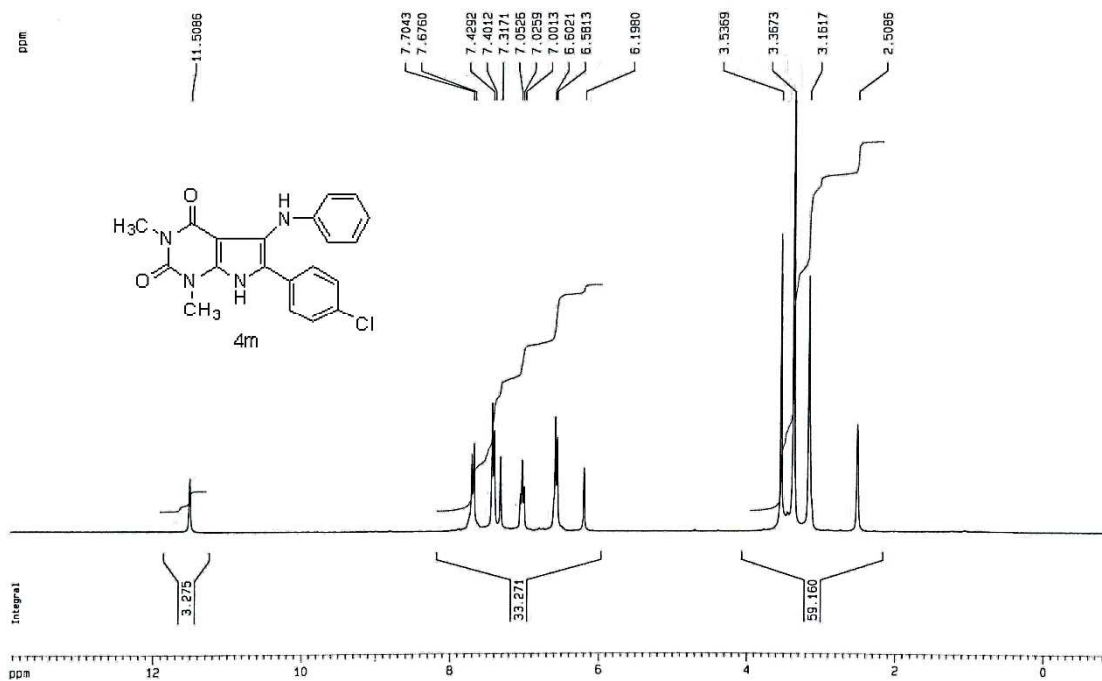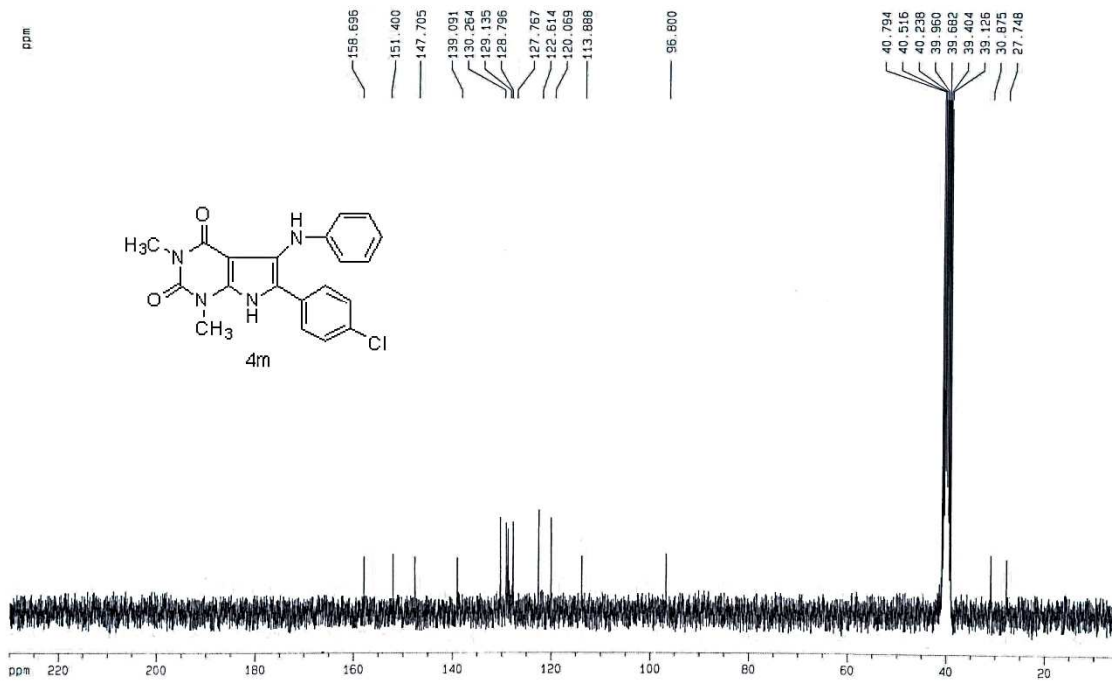

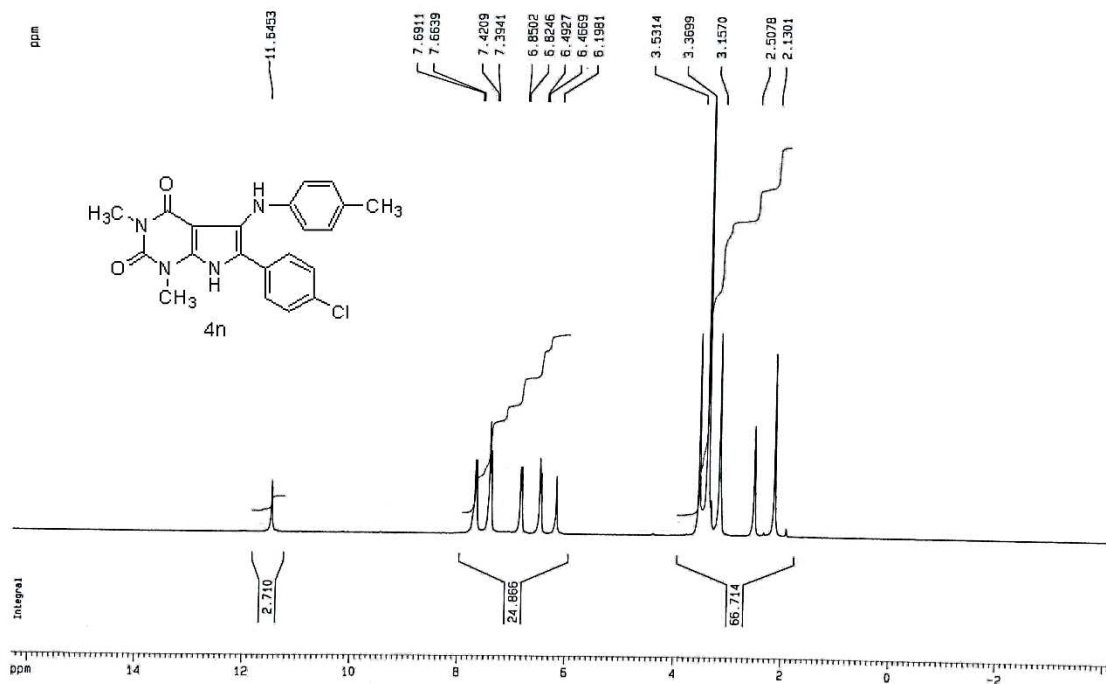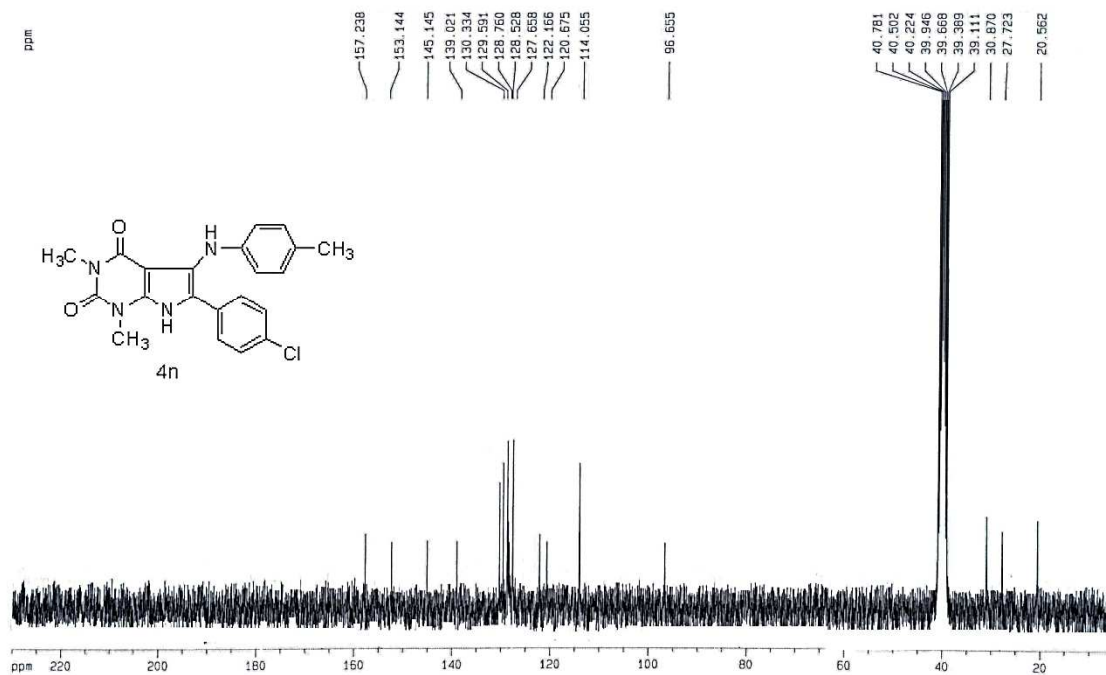

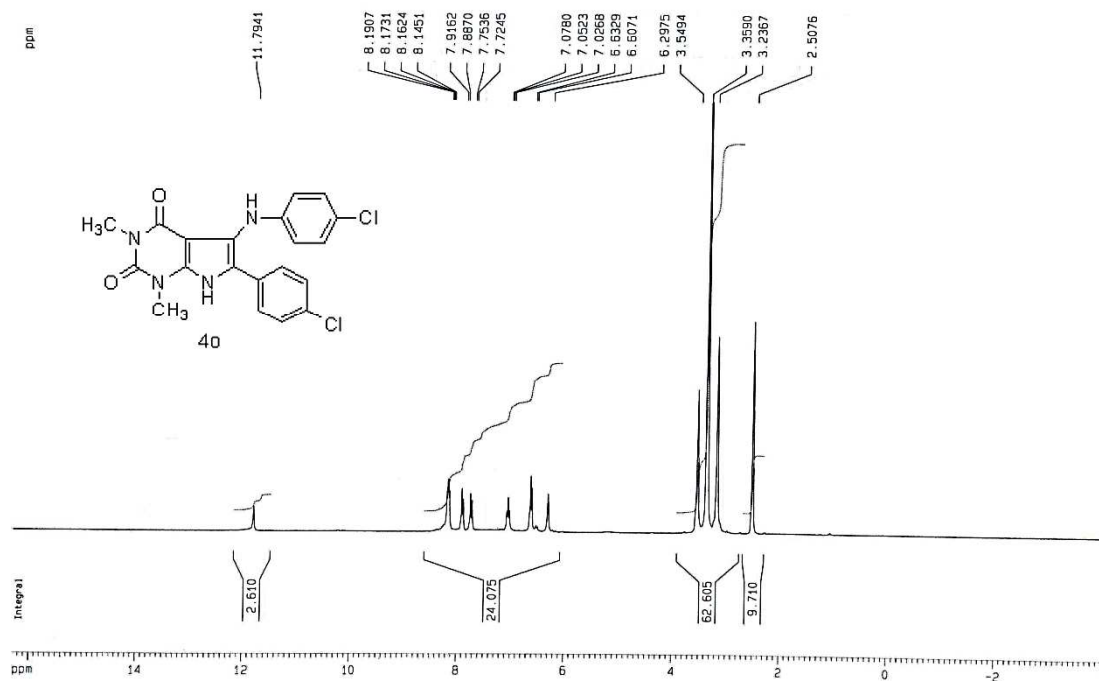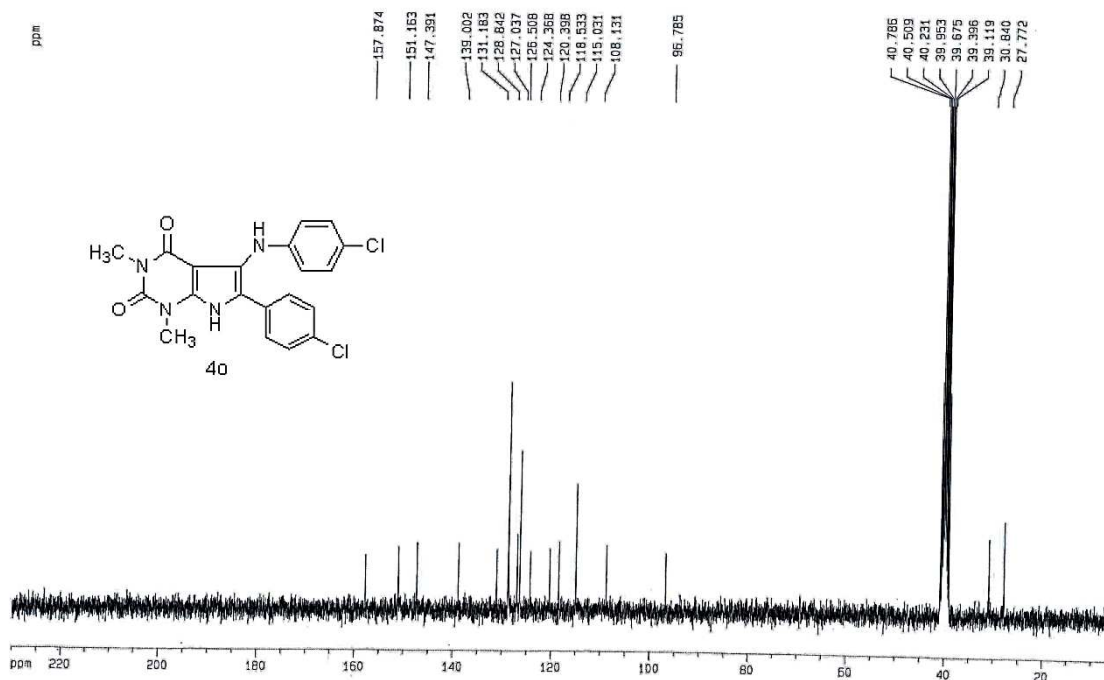



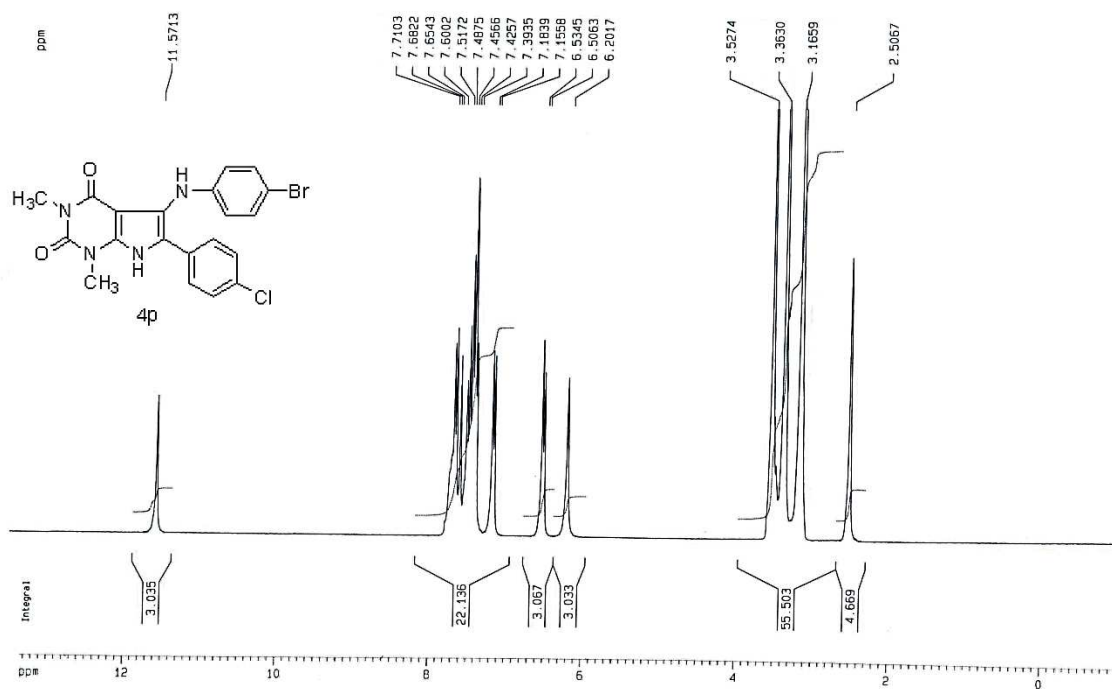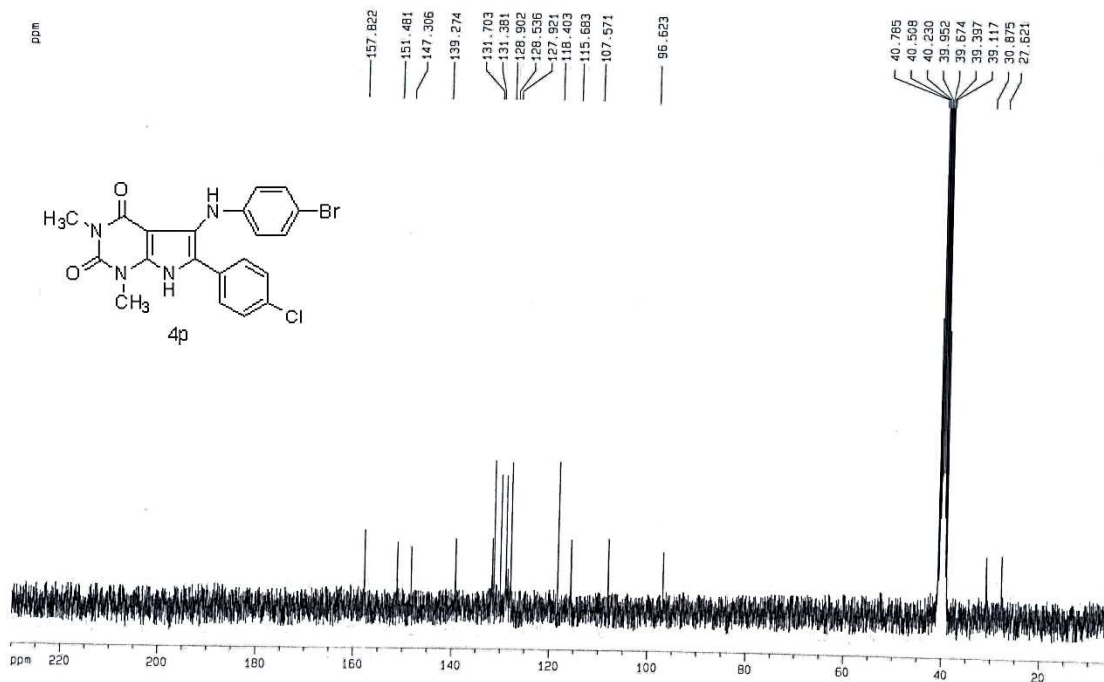

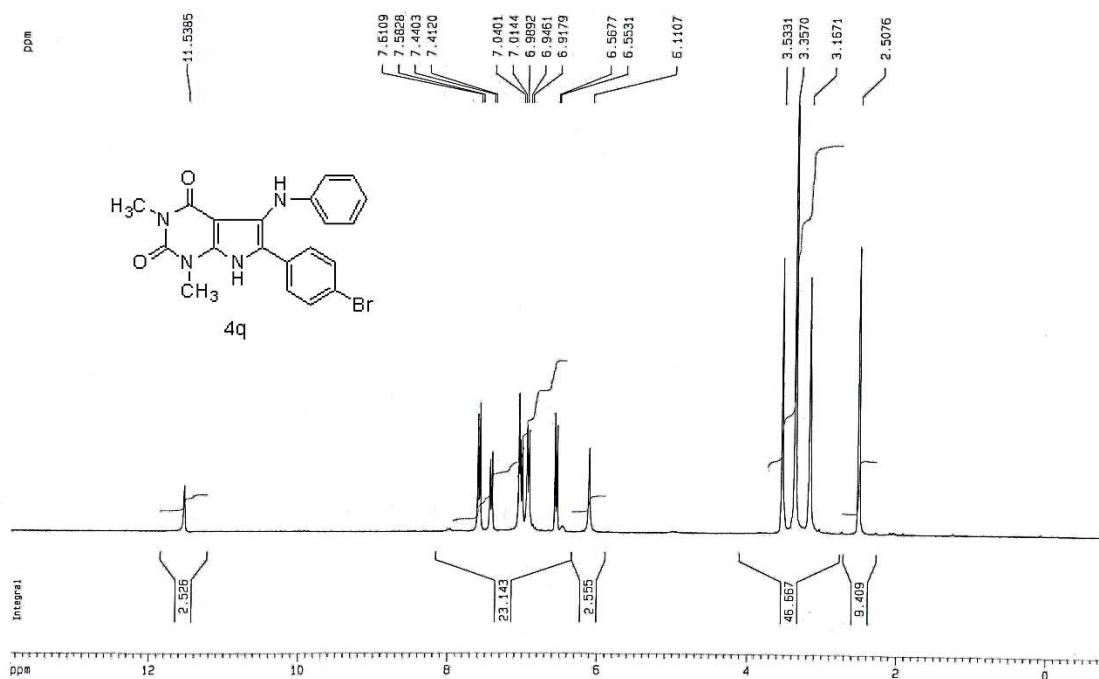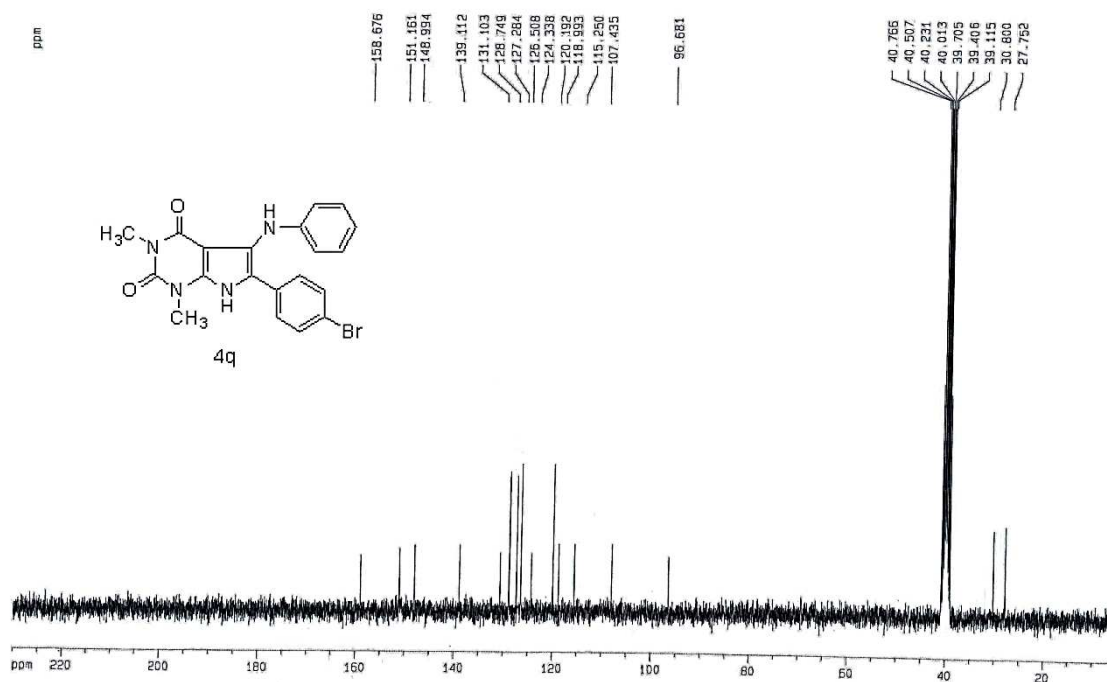

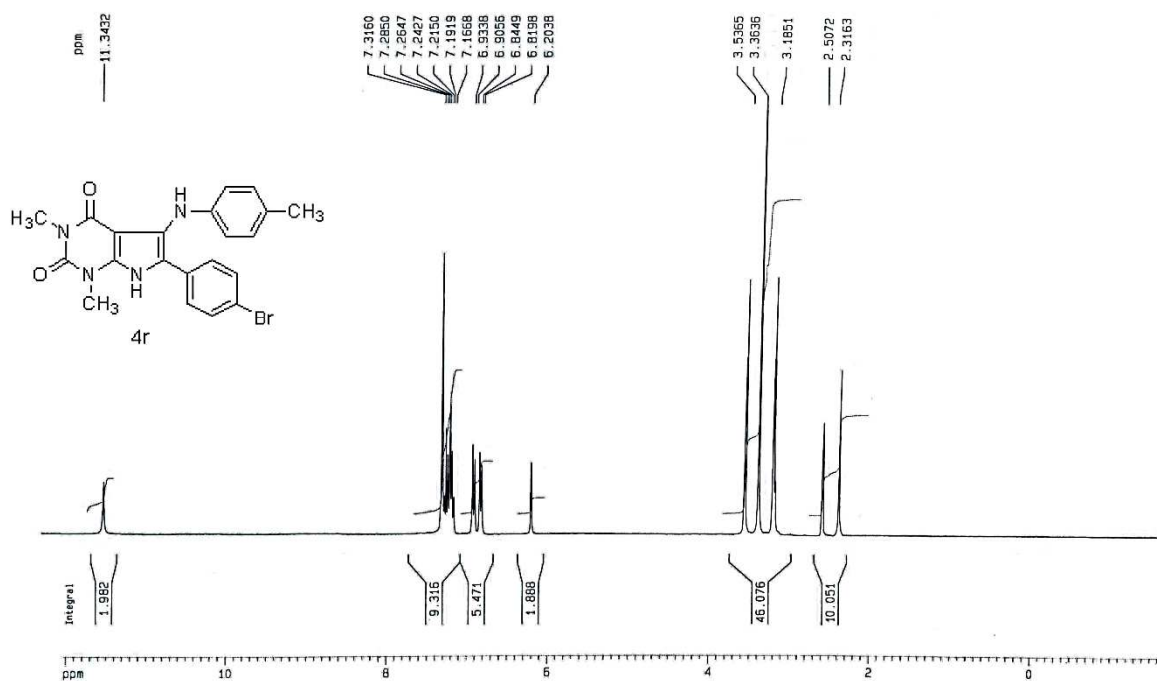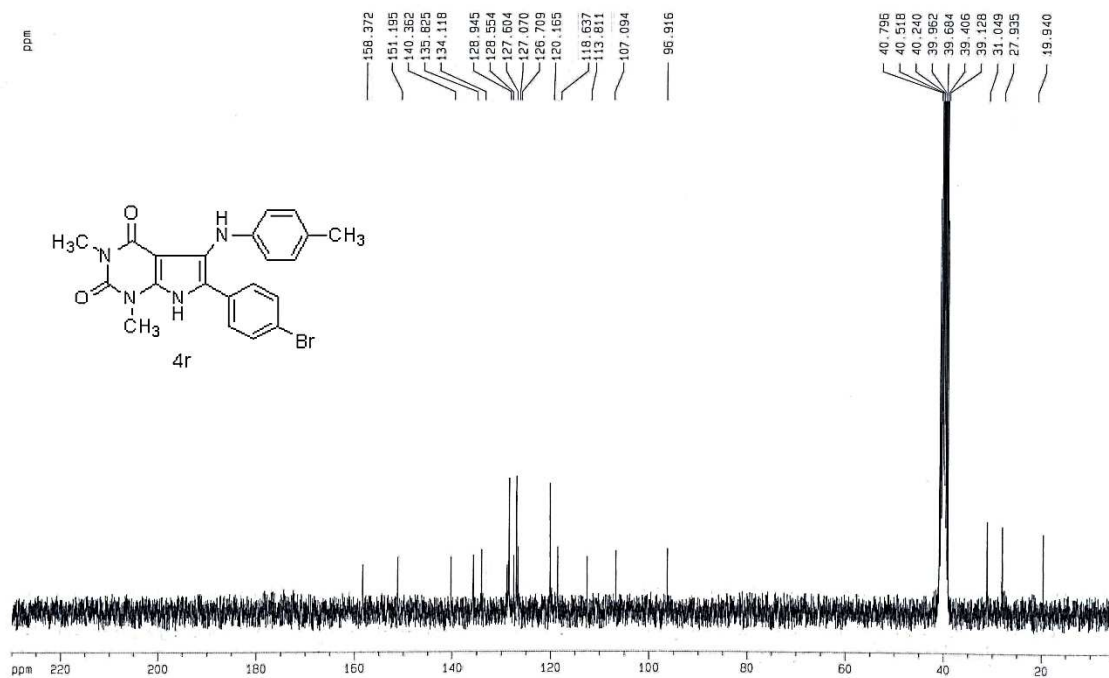

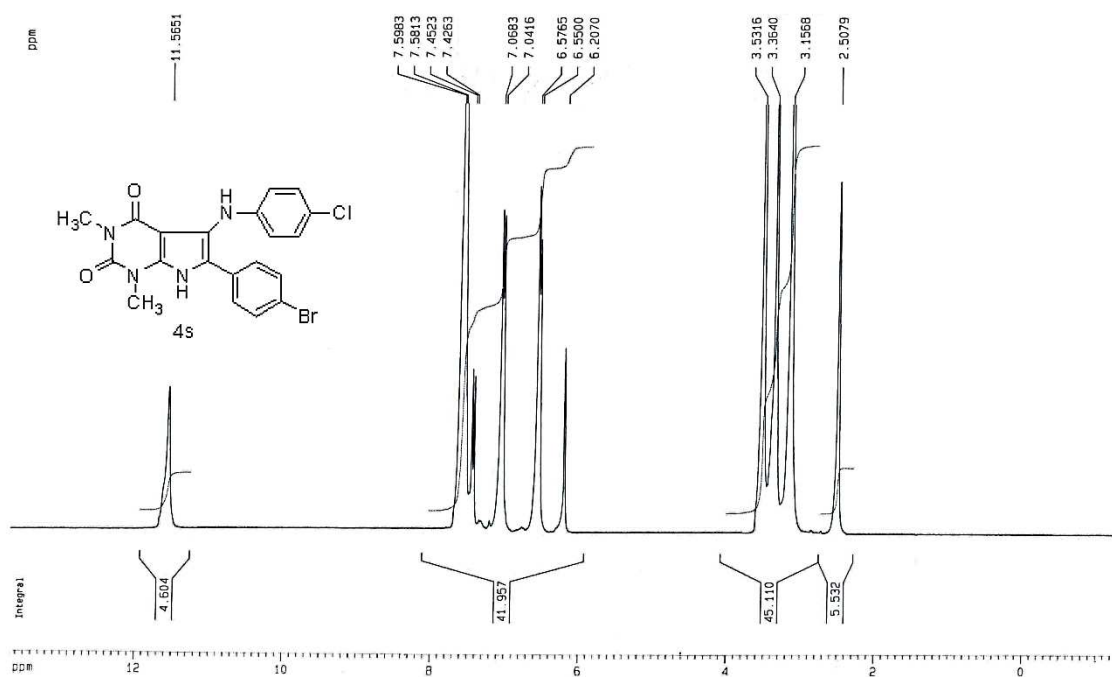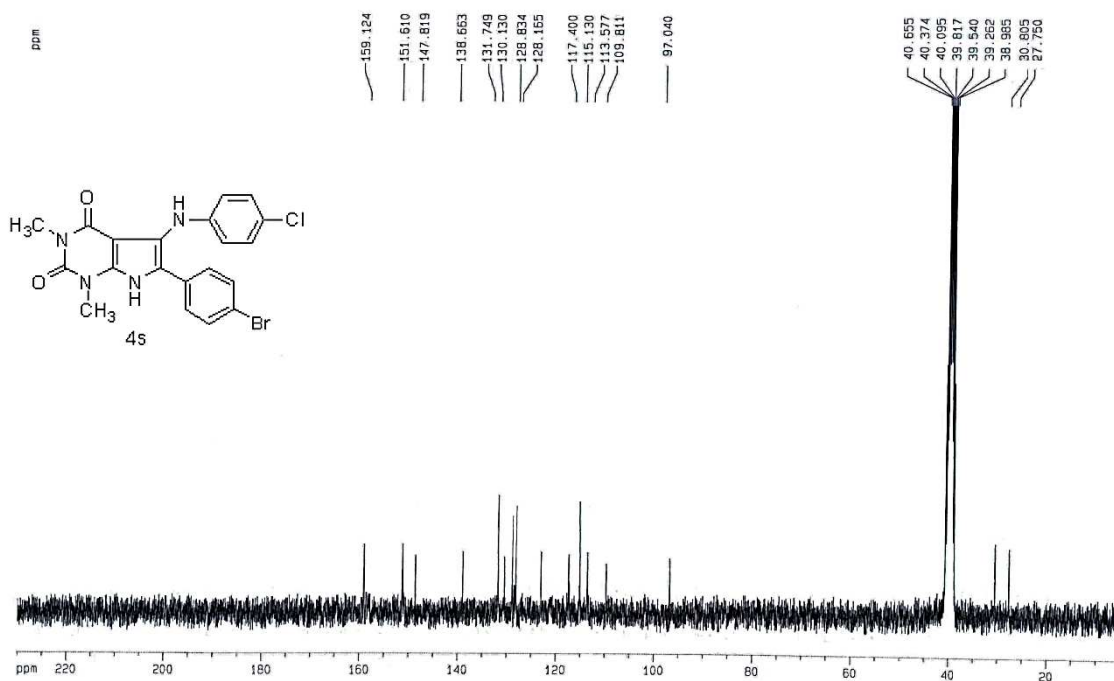

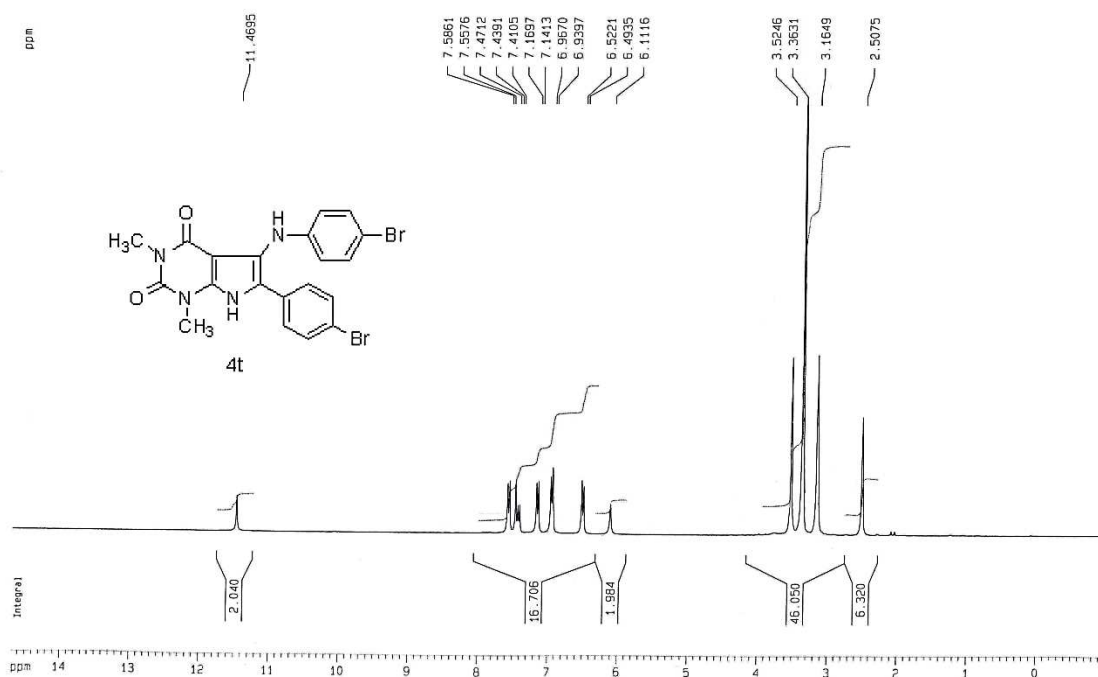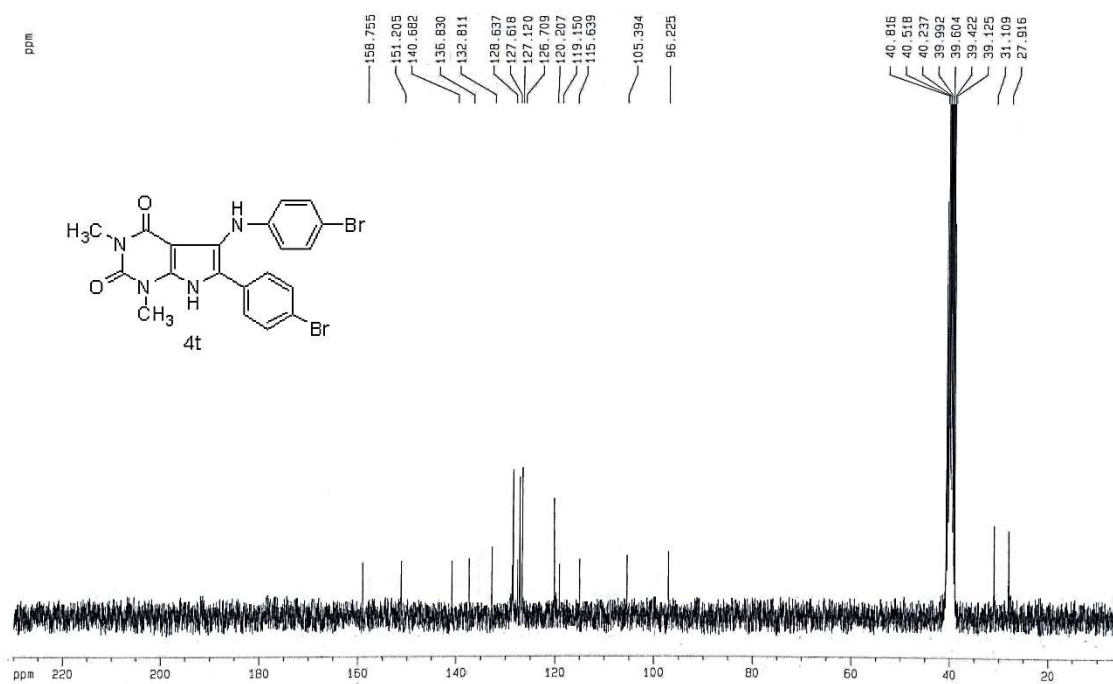

Supplement: c3ra47143h.pdf [file c3ra47143h.pdf]
